**TITLE: Axon arrival times and physical occupancy establish visual projection neuron integration on developing dendrites in the *Drosophila* optic glomeruli.**

**AUTHOR NAMES AND AFFILIATIONS**

Brennan W. McFarland<sup>1</sup>, HyoJong Jang<sup>1#</sup>, Natalie Smolin<sup>1#</sup>, Bryce W. Hina<sup>1</sup>, Michael J. Parisi<sup>2</sup>, Kristen C. Davis<sup>2</sup>, Timothy J. Mosca<sup>2</sup>, Tanja A. Godenschwege<sup>3</sup>, Aljoscha Nern<sup>4</sup>, Yerbol Z. Kurmangaliyev<sup>5</sup>, Catherine R. von Reyn<sup>\*1,6</sup>

<sup>1</sup> School of Biomedical Engineering, Science and Health Systems, Drexel University, Philadelphia, PA

<sup>2</sup> Department of Neuroscience, Vickie and Jack Farber Institute of Neuroscience, Thomas Jefferson University, Philadelphia, PA

<sup>3</sup> Department of Biological Sciences, Florida Atlantic University, Boca Raton, FL

<sup>4</sup> Janelia Research Campus, Howard Hughes Medical Institute, Ashburn, VA

<sup>5</sup> Department of Biology, Brandeis University, Waltham, MA

<sup>6</sup> Department of Neurobiology and Anatomy, Drexel University College of Medicine, Philadelphia, PA

# Equal contribution

\*Correspondence: [crv33@drexel.edu](mailto:crv33@drexel.edu)

## 1 SUMMARY

2 Behaviorally relevant, higher order representations of an animal's environment are built from the  
3 convergence of visual features encoded in the early stages of visual processing. Although  
4 developmental mechanisms that generate feature encoding channels in early visual circuits have  
5 been uncovered, relatively little is known about the mechanisms that direct feature convergence  
6 to enable appropriate integration into downstream circuits. Here we explore the development of a  
7 collision detection sensorimotor circuit in *Drosophila melanogaster*, the convergence of visual  
8 projection neurons (VPNs) onto the dendrites of a large descending neuron, the giant fiber (GF).  
9 We find VPNs encoding different visual features establish their respective territories on GF  
10 dendrites through sequential axon arrival during development. Physical occupancy, but not  
11 developmental activity, is important to maintain territories. Ablation of one VPN results in the  
12 expansion of remaining VPN territories and functional compensation that enables the GF to  
13 retain responses to ethologically relevant visual stimuli. GF developmental activity, observed  
14 using a pupal electrophysiology preparation, appears after VPN territories are established, and  
15 likely contributes to later stages of synapse assembly and refinement. Our data highlight  
16 temporal mechanisms for visual feature convergence and promote the GF circuit and the  
17 *Drosophila* optic glomeruli, where VPN to GF connectivity resides, as a powerful developmental  
18 model for investigating complex wiring programs and developmental plasticity.

19

20 Keywords: Pupal Development, *Drosophila melanogaster*, Giant Fiber, Optic Glomeruli, Neural  
21 Activity, Adaptation, Electrophysiology, Visual Projection Neurons, Visual System, Descending  
22 Neuron

23

## 24 INTRODUCTION

25 In a developing brain, the coordinated wiring of multiple inputs onto a neuron and  
26 organization of these inputs across a neuron's dendrites establish the computational role for that  
27 neuron. Uncovering the mechanisms that assemble and localize multiple inputs is pivotal to  
28 understand how inputs are miswired in neurodevelopmental disorders<sup>1-3</sup> and how developmental  
29 processes attempt to compensate when particular inputs are missing or fail to connect<sup>4,5</sup>. Across  
30 species, we know little about how multiple inputs that converge upon a neuron are wired during  
31 development because the underlying circuits are often not well established – we are missing the  
32 solution to the wiring program, where all inputs are known and synapse locations are mapped.

33 Here, we capitalize on recent connectome data and functional investigations within the  
34 *Drosophila* optic glomeruli, a central brain region where visual feature inputs converge onto  
35 sensorimotor circuits<sup>6-10</sup>. Optic glomeruli are the output region for columnar visual projection  
36 neurons (VPNs) that are hypothesized to encode visual features<sup>9,11-14</sup>. VPN dendrites are  
37 retinotopically distributed to tile the lobula and the lobula plate of the fly's optic lobes, while  
38 fasciculated VPN axons terminate within their respective glomerulus<sup>11</sup>. Within each glomerulus,  
39 VPNS synapse with multiple targets, including descending neurons (DNs) that project axons to  
40 the ventral nerve cord (VNC, the fly spinal cord homologue) where they in turn synapse onto  
41 interneurons and motoneurons that generate behavioral outputs<sup>15-17</sup>. Unlike the *Drosophila*  
42 olfactory glomeruli which have a predominantly one to one olfactory receptor neuron to  
43 projection neuron mapping<sup>18</sup>, each VPN glomerulus is not dedicated to a single DN type.  
44 Instead, DN dendrites infiltrate multiple, semi-overlapping subsets of glomeruli<sup>10,16,19</sup>, essentially  
45 assembling VPN features into higher order, behaviorally relevant motor and premotor outputs.

46 How this complex wiring of visual feature inputs onto DNs is established during development is  
47 presently unknown.

48 A pair of large DNs called the giant fibers (GFs) receive major input from two VPN types  
49 in the optic glomeruli: lobula columnar type 4 (LC4) neurons and lobula plate - lobula columnar  
50 type 2 (LPLC2) neurons (Figure 1A)<sup>6,7,13</sup>. LC4 and LPLC2 encode the angular velocity and  
51 angular size of an expanding object, respectively<sup>6,7</sup>, and enable the GFs to drive a rapid takeoff  
52 escape in response to an object approaching on a direct collision course<sup>17</sup>. The GF circuit within  
53 the optic glomeruli presents an ideal model for developmental investigations. GF connectivity in  
54 adult flies has been recently established through electron microscopy, genetic access exists for  
55 the GF and its major visual input cell types, and the large GF dendrites within the glomeruli can  
56 be resolved and tracked across development<sup>6,7,20,21</sup>. Additionally, the accessibility of the GF to  
57 electrophysiology enables the functional consequences of developmental events to be directly  
58 evaluated<sup>6,7</sup>. GF dendrites are also in close proximity to VPNs that are not synaptic partners in  
59 the adult, like lobula plate - lobula columnar type 1 (LPLC1) neurons. This provides an  
60 opportunity to investigate developmental interactions with cell types that do or do not select the  
61 GF as a synaptic partner.

62 Here, we establish the GF circuit<sup>6,7,17</sup> as a model for visual feature convergence in a  
63 developing nervous system. We screened VPN and GF GAL4 and LexA driver lines for early  
64 developmental expression and cell-type specificity. We then used identified driver lines to  
65 characterize the timecourse of VPN and GF interactions across metamorphosis that lead to their  
66 final organization in the adult. Combining a comprehensive single-cell RNA sequencing  
67 (scRNA-seq) atlas of the developing *Drosophila* visual system<sup>22</sup>, synaptic protein labeling over  
68 development, and a novel *ex-plant* electrophysiology preparation that enabled us to record from

69 the GF at distinct developmental timepoints, we correlated the time course of VPN to GF  
70 interactions with the arrival of synaptic machinery and neural activity. To determine how  
71 competition shapes VPN synapse organization along GF dendrites, we genetically ablated one  
72 VPN cell type (LC4) and investigated both structural and functional compensation from the  
73 surviving VPN partner (LPLC2). Our data provide a thorough characterization of the assembly  
74 of visual feature convergence onto GF dendrites and establish the optic glomeruli as a genetically  
75 and functionally tractable model to uncover mechanisms underlying complex wiring programs.

76

## 77 **RESULTS**

### 78 **VPNs are localized to stereotyped regions on GF dendrites**

79 GF dendrites extend into the optic glomeruli in close proximity to multiple VPN cell-  
80 types (Figure 1A,B). EM reconstruction of a full adult fly brain (FAFB<sup>20</sup>) previously revealed  
81 that 55 LC4 and 108 LPLC2 neurons connect directly onto GF optic glomeruli dendrites,  
82 contributing 2,442 and 1,366 synapses, respectively<sup>7</sup>. VPN synapses segregate across the medial-  
83 lateral axis, with LC4 predominantly localized to medial, and LPLC2 to lateral, dendritic  
84 regions<sup>7</sup>. To investigate stereotypy in VPN to GF connectivity, we utilized a second EM dataset  
85 of a *Drosophila* hemibrain<sup>21,23</sup>. In this EM reconstruction, we found LC4 (71/71) and LPLC2  
86 (85/85) neurons established 2,290 and 1,443 synapses onto the GF optic glomeruli dendrites,  
87 respectively (Figure 1C). We confirmed LC4 and LPLC2 synapses segregate along the medial-  
88 lateral axis, with only 2/85 LPLC2 neurons making synapses in predominantly LC4 occupied  
89 medial areas.

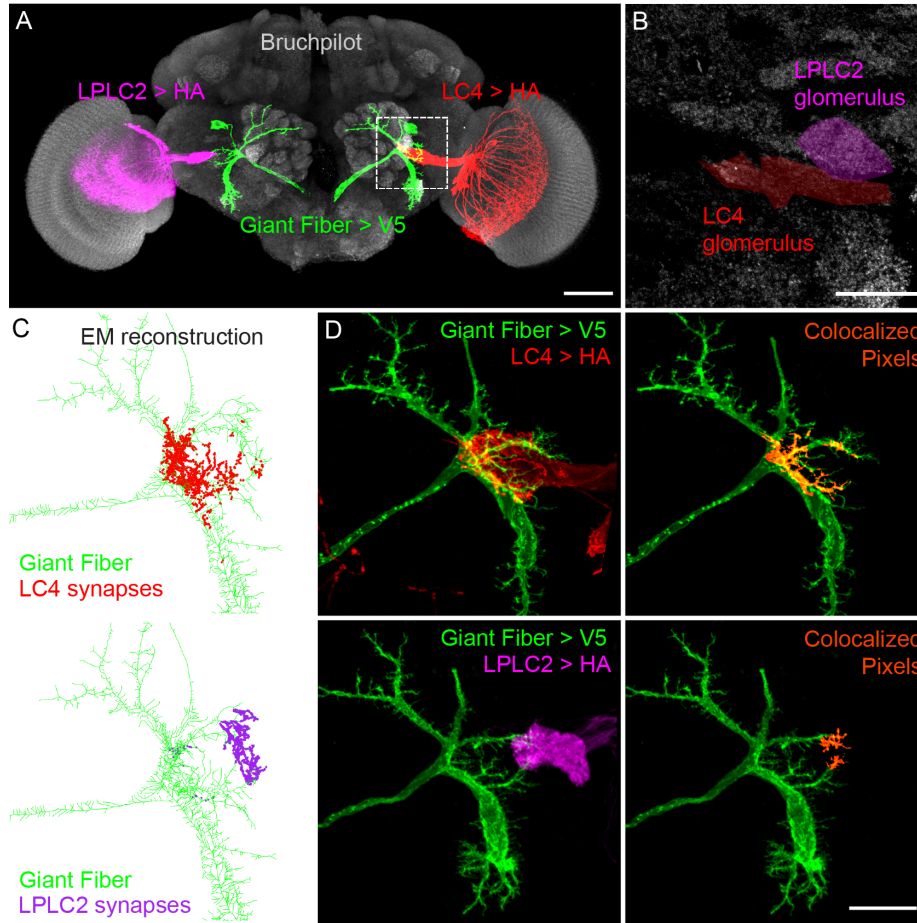

90

91 **Figure 1. LC4 and LPLC2 occupy distinct regions on GF dendrites**

92 (A) GF (green), LPLC2 (magenta, one hemisphere), and LC4 (red, one hemisphere) maximum  
93 intensity projections superimposed over neuropil label Bruchpilot (Brp, gray) Scale bar, 50µm.  
94 (B) Optic glomeruli as identified by Brp labeling with the LPLC2 (magenta) and LC4 (red)  
95 glomeruli highlighted. Maximum intensity projection of a substack located within the dashed  
96 box in (A). Scale bar, 20µm.  
97 (C) *Drosophila* hemibrain EM reconstruction of GF (green) with colored dots indicating  
98 synapses from LC4 (red, top) and LPLC2 (magenta, bottom).  
99 (D) (Left) Maximum intensity projections of dual labeled GF and VPNs. (Right) Colocalized  
100 pixels (orange) between GF and respective VPNs superimposed over GF maximum intensity  
101 projections. Scale bar, 20µm.  
102

103 Since existing EM data only represent connectivity within two fly brains, we further  
104 investigated localization stereotypy by examining contacts between GF and VPN membranes  
105 across multiple adult flies. We used split-GAL4 driver lines that selectively labeled LC4 (*LC4\_4-*  
106 *split-GAL4*, generated for this paper) or LPLC2 (*LPLC2-split-GAL4*)<sup>11</sup>, and simultaneously

107 labeled the GF with a LexA line (*GF\_I-LexA*)<sup>24</sup> (Figure 1D, left). As a proxy for membrane  
108 contacts, we performed intensity-based thresholding on each cell-type of interest to generate  
109 representative masks, and then visualized colocalized regions along GF dendrites (Figure 1D,  
110 right). We consistently observed LC4 contacts on the most medial regions of the GF optic  
111 glomeruli dendrites and LPLC2 contacts on the most lateral regions. We also found on occasion  
112 (4/17 brain hemispheres), as seen in the hemibrain dataset, a small subset of LPLC2 axons  
113 extending into the most medial regions on the GF (Supplemental Figure 1, arrow)<sup>21</sup>. These data  
114 suggest that LC4 and LPLC2 consistently segregate to stereotyped regions along the medial-  
115 lateral axis with rare exceptions.

116 We used the same approach to assess the projections of LPLC1 (*LPLC1\_I-split-GAL4*)<sup>11</sup>,  
117 a cell-type adjacent to LC4 and LPLC2 that does not synapse directly with the GF<sup>7</sup>. As expected,  
118 no synapses were identified in the hemibrain EM dataset (Supplemental Figure 2) and no  
119 membrane contacts were observed between GF and LPLC1 across all adult flies imaged with  
120 confocal microscopy (Supplemental Figure 2). We additionally employed GFP reconstitution  
121 across synaptic partners (GRASP)<sup>25,26</sup> to visualize contacts between adjacent membranes and  
122 observed GFP expression between GF and LC4/LPLC2 in their respective medial/lateral  
123 locations, but not between GF and LPLC1 (Supplemental Figure 3).

124

### 125 **GF lateral dendrites extend, elaborate, and then refine across pupal stages**

126 Following our detailed anatomical characterization, we sought to determine how the  
127 precise VPN localization along GF dendrites arises across development. Prior developmental  
128 investigations into the GF have focused on axonal wiring with respect to postsynaptic  
129 interneuron and motor neuron partners in the ventral nerve cord (VNC)<sup>27-32</sup>. However, little is

130 known about how GF dendrites develop in the central brain<sup>33</sup>. The GF is born during embryonic  
131 stages but does not generate neurites until the third instar larval stage<sup>27</sup>. To track the GF at these  
132 early timepoints, we used the *GF\_I-LexA* line that labels the GF starting in late larval stages  
133 (Supplemental Figure 4) and dissected pupae in 12-hour increments over metamorphosis, a  
134 period marked as the time between pupa formation and eclosion.

135         Across development, we tracked the complexity and size of GF optic glomeruli dendrites  
136 by quantifying their volume (Figure 2A,B) and the length of the maximum dendrite extension  
137 along the medial-lateral axis (Figure 2A,C). In the early stages of metamorphosis, 24-48 hours  
138 after pupa formation (hAPF), the GF exhibited numerous filopodia, long thin protrusions without  
139 a bulbous head, and arbor complexity increased with the GF projecting between  $3.1 \pm 1.0$   
140 primary dendrites laterally (Figure 2A,B). During the middle stages of metamorphosis, from 48  
141 hAPF to 60 hAPF, the GF dendrites had the largest increase in their medial-lateral extent (Figure  
142 2C), followed by a peak in the overall volume and extension length at 72 hAPF (Figure 2A-C).  
143 During this time, filopodia were still present, but visibly shorter than in the first half of  
144 metamorphosis. In the final stages of metamorphosis from 72 hAPF to eclosion, the volume of  
145 GF dendrites significantly decreased (Figure 2A-C), while the medial-lateral length was  
146 maintained. Filopodia were no longer obvious, and branches appeared less complex and began to  
147 resemble their adult morphology.



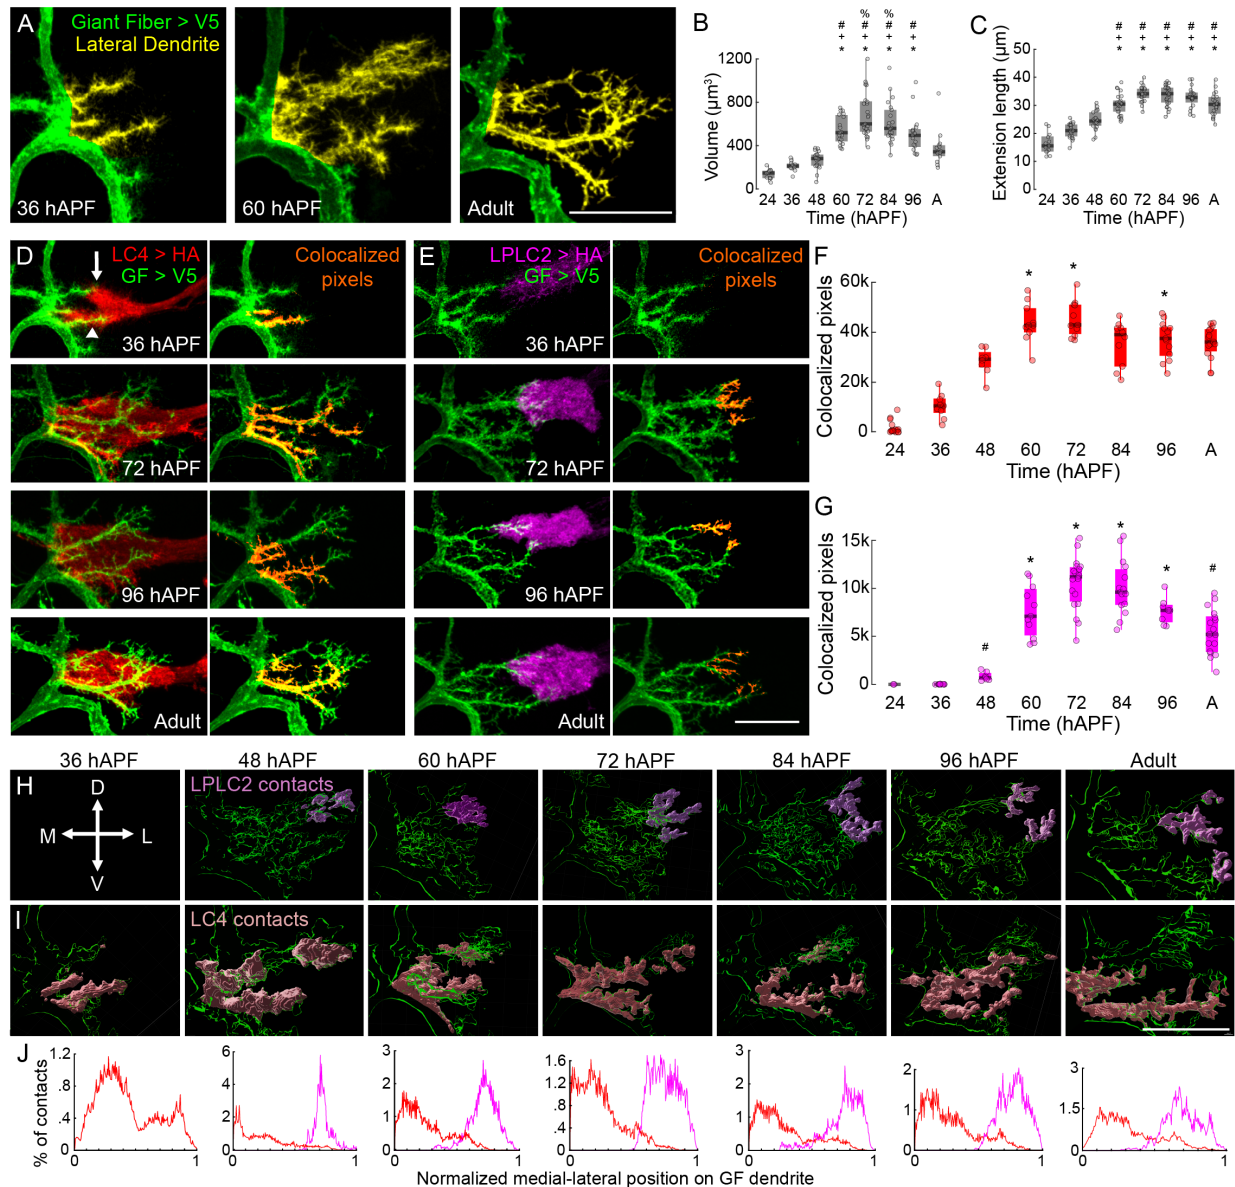

148

149 **Figure 2. LC4 and LPLC2 territories on GF dendrites are established early in development**

150 (A) Maximum intensity projections of GF (green) 36 hAPF (left), 60 hAPF (middle), and in  
 151 in adult (right) with the VPN dendritic region highlighted in yellow at distinct developmental  
 152 stages. Scale bar, 20µm.

153 (B) Quantification GF lateral dendrite volume from (A). Unpaired Kruskal-Wallis test ( $p = 1.339$   
 154  $\times 10^{-18}$ ), Tukey-Kramer multiple comparison test post hoc, \* =  $p < .05$  as compared to 24 hAPF,  
 155 + =  $p < .05$  as compared to 36 hAPF, # =  $p < .05$  as compared to 48 hAPF, and % =  $p < .05$  as  
 156 compared to adult.  $N \geq 13$  hemibrains from  $\geq 10$  flies.

157 (C) Quantification of maximum dendrite extension length across the medial-lateral axis.  
 158 Unpaired Kruskal-Wallis test ( $p = 2.072 \times 10^{-12}$ ), Tukey-Kramer multiple comparison test post  
 159 hoc, \* =  $p < .05$  compared to 24 hAPF, + =  $p < .05$  compared to 36 hAPF, # =  $p < .05$  compared  
 160 to 48 hAPF.

161 **(D,E)** Left, maximum intensity projections of GF (green) with respect to LC4 (red, D), and  
162 LPLC2 (magenta, E) axonal membrane at distinct developmental stages. Right, maximum  
163 intensity projections of GF with VPN colocalized pixels (orange) superimposed along GF  
164 dendrites. Arrow and arrowheads indicate divergent dorsal and ventral VPN axons, respectively.  
165 Scale bar, 20 $\mu$ m.

166 **(F,G)** Quantification of colocalization in (D,E) with colors corresponding to VPN type. Unpaired  
167 Kruskal-Wallis test (LC4,  $p = 2.088 \times 10^{-12}$ ; LPLC2,  $p = 1.983 \times 10^{-10}$ ), Tukey-Kramer multiple  
168 comparison test post hoc, \* =  $p < .05$  as compared to 36 hAPF, +=  $p < .05$  as compared to 60  
169 hAPF, # =  $p < .05$  as compared to 72 hAPF.  $N \geq 6$  hemibrains from  $\geq 3$  flies.

170 **(H,I)** 3D renderings of GF lateral dendrites (green) with LPLC2 (H, magenta) or LC4 (I, red)  
171 colocalized pixels superimposed at distinct timepoints during development. Scale bar, 20 $\mu$ m. D -  
172 dorsal, V - ventral, M - medial, L - lateral.

173 **(J)** Histograms of the spatial distribution of LC4 and LPLC2 contacts along the normalized  
174 medial-lateral GF dendrite axis across development; colors are the same as in (H, I). N are as  
175 stated in (F,G).

176

## 177 **Initial contacts between GF and VPNs are staggered in time**

178 We next investigated VPN axon targeting with respect to GF dendritic outgrowth. At  
179 present, it is unknown when columnar VPN neurons are born<sup>34</sup>, but these neurons may arise in  
180 late larval to early pupal stages, a period when neuroblasts give rise to visual neurons (such as  
181 T4/T5) that provide input to VPN dendrites in the lobula and lobula plate<sup>35-37</sup>. We hypothesized  
182 VPNs would commence outgrowth and partner matching in coordination with GF dendrite  
183 development. To visualize developmental interactions of select VPN and GF, we used existing<sup>11</sup>  
184 or newly developed VPN split-GAL4 driver lines screened for pupal expression (Supplemental  
185 Figure 4), to concurrently label select VPN cell-types (*LC4\_4-split-GAL4*, *LPLC2-split-GAL4*,  
186 *LPLC1\_1-split-GAL4*) and the GF (*GF\_1-LexA*) over metamorphosis. To quantify interactions,  
187 we employed our membrane colocalization method (Figure 1D) instead of synapse labeling  
188 methods (such as t-GRASP<sup>38</sup>) because we wanted to track all putative interactions, including  
189 those that precede synapse formation, over time and did not want to create ectopic adhesions  
190 between membranes. We additionally compared our membrane colocalization method to a

191 GRASP variant that is not restricted to presynaptic terminals<sup>25</sup> and found no statistical difference  
192 between the number of colocalized or GFP positive pixels (Supplemental Figure 5).

193 Using colocalization as a proxy for membrane contacts, we investigated developmental  
194 interactions between GF and its known adult partner VPNs, LC4 and LPLC2. We observed LC4  
195 axonal extension and initial contact with GF at 24 hAPF (Figure 2F). At this timepoint, LC4  
196 axons diverge into a dorsal fraction projected near the dorsal branch of the GF optic glomeruli  
197 dendrites, and a ventral fraction projected towards the proximal regions of the GF dendrites  
198 (Supplemental Figure 6). At 36 hAPF, contacts between the GF and LC4 increased, with both  
199 dorsal and ventral fractions still apparent (Figure 2D, arrow, arrowhead, respectively). Although  
200 *LPLC2-split-GAL4* shows obvious expression at this time, we did not observe any contacts  
201 between LPLC2 and the GF (Figure 2E,G).

202 At 48 hAPF, LC4 and GF continued to show an increase in contacts (Figure 2F), and LC4  
203 dorsal and ventral axons had converged (Supplemental Figure 6). At this time, approximately 24  
204 hours after initial GF and LC4 contact, we observed GF contacts with LPLC2 (Figure 2E,G) as  
205 the dorsal branch of the GF dendrites extended past LC4 axons (Supplemental Figure 6,  
206 arrowhead). Altogether, our data suggest that during the first half of metamorphosis, as the GF is  
207 seeking out synaptic partners, interactions with VPN are staggered in time.

208 After the initial establishment of contacts, we next observed a significant increase in  
209 contacts between partner VPNs and GF from 60 hAPF to 72 hAPF (Figure 2D-G). At 84 hAPF  
210 through eclosion, contacts between GF and both VPNs decreased and then stabilized. Our results  
211 suggest that in the second half of metamorphosis, GF prioritizes dendritic outgrowth, enhances  
212 contacts with partner VPN, and eventually refines and stabilizes contacts with appropriate VPN  
213 partners, LC4 and LPLC2.

214 We next investigated interactions between GF and a neighboring VPN, LPLC1, that does  
215 not maintain synapses with GF in adulthood (Supplemental Figure 2). We observed a relatively  
216 small number of contacts between GF and neurons labeled with *LPLC1\_1-split-GAL4*<sup>11</sup>  
217 appearing around 48 hAPF, peaking around 60 hAPF, and disappearing around 84 hAPF  
218 (Supplemental Figure 7A,B). This driver line, however, may also label a subset of VPN that are  
219 not LPLC1 during development (Supplemental Figure 7D,E), so we repeated our contact analysis  
220 by generating two new LPLC1 driver lines, *LPLC1\_2-split-GAL4* and *LPLC1\_3-split-GAL4*  
221 (Supplemental Figure 4). While these driver lines revealed GF and LPLC1 membranes are  
222 adjacent at 60 hAPF, we observed minimal to no contacts with GF (Supplemental Figure 7C).  
223 Altogether, these results suggest that early in development, GF contacts are already biased  
224 towards VPNs that are synaptically coupled to the GF in the adult.

225

## 226 **LC4 and LPLC2 occupy and maintain distinct regions along the GF dendrite**

227 In the adult GF circuit, LC4 inputs are localized to the medial regions of GF dendrites,  
228 whereas LPLC2 inputs are localized to the most lateral regions (Figure 1). It is unknown if this  
229 medial-lateral segregation is established initially or arises over development. To address this, we  
230 manually aligned the GF dendrites across brains and quantified the density of contacts along the  
231 medial-lateral axis. Across all time points, we found minimal overlap between LC4 and LPLC2;  
232 the peak density of contacts for LC4 and LPLC2 consistently occupied the most medial and  
233 lateral regions, respectively (Figure 2H-J).

234 The GF optic glomeruli dendrites contain dorsal and ventral branches, therefore we  
235 repeated the analysis of membrane contacts along the dorsal-ventral axis. At 48 hAPF, LPLC2  
236 contacts were primarily confined to the dorsal regions, and LC4 to the ventral regions

237 (Supplemental Figure 8). This segregation was reduced at 60 hAPF and less obvious in the later  
238 stages of development (84 hAPF – 96 hAPF), in alignment with previous investigations into  
239 adult synapse localization along the dorsal-ventral axis<sup>7</sup>. Altogether, our results highlight the  
240 importance of the medial-lateral division of LC4 and LPLC2 inputs onto GF dendrites, where  
241 targeting is established early and maintained throughout development.

242

### 243 **Upregulation of synaptic machinery across key stages of metamorphosis**

244 Although our colocalization data provide the time course for interactions between VPN  
245 axons and GF dendrites across development, they do not provide information on the timing of  
246 synaptogenesis. We therefore investigated how our time course for GF/VPN interactions aligned  
247 with the expression of presynaptic machinery (Figure 3A,B). We used a comprehensive scRNA-  
248 seq atlas of the developing *Drosophila* visual system which profiled optic lobe neurons at  
249 multiple time points across metamorphosis and identified both global and cell-type specific  
250 transcriptional programs<sup>22</sup>.

251 As developmental clusters corresponding to LC4, LPLC2, and LPLC1 have been  
252 identified in this dataset, we re-analyzed these data to determine when genes required for  
253 synaptic transmission were upregulated in metamorphosis. We first investigated the expression  
254 of *brp*, a presynaptic active zone protein that is homologous to the mammalian ELKS/CAST  
255 family<sup>39,40</sup> that is commonly used to label presynaptic terminals. We found *brp* to be present as  
256 early as 24 hAPF and gradually increase up until 60 – 72 hAPF (Figure 3B, Supplemental  
257 Figures 9,10). Presynaptic genes in the SNARE complex<sup>41-44</sup> *nSyb*, *cpx*, *Snap25* and *Syx1A* were  
258 also present at early pupal stages, but significant upregulation was delayed with respect to *brp*,  
259 from around 60 hAPF until the end of metamorphosis (Figure 3B, Supplemental Figures 9,10).

260 LC4, LPLC1 and LPLC2 are predicted to be cholinergic<sup>44</sup>, and we found genes for cholinergic  
261 synapse function (*ChAT* and *VACHT*) were upregulated in the late stages of metamorphosis ( $\geq 60$   
262 hAPF) (Figure 3A, Supplemental Figure 9-10), delayed from the initial appearance of  
263 presynaptic machinery, but following the time course reported for other cholinergic neurons<sup>22</sup>.  
264 This upregulation coincides with our observed decrease in GF dendritic complexity, and  
265 refinement and stabilization of GF and VPN contacts (Figure 2F,G, Supplemental Figure 7A-C).  
266 These data suggest that although a subset of presynaptic components are expressed and  
267 potentially assembled early, VPN cholinergic machinery arrives too late to contribute to the  
268 initial targeting and localization of VPN axons on GF dendrites. Cholinergic activity instead is  
269 likely to participate in VPN and GF synapse refinement and stabilization.

270           Given the significant role electrical synapses play across development, we also examined  
271 expression of the innexin family of gap junction proteins. Shaking-B (*shakB*) has been denoted  
272 to be the predominant innexin over development<sup>22</sup>, and we also observed a significant increase as  
273 early as 36 hAPF (Figure 3B, Supplemental Figures 9,10) with all other innexins showing  
274 minimal to no expression across metamorphosis. *shakB* expression peaked between 48-60 hAPF,  
275 followed by a significant decrease from 60 hAPF to 72 hAPF for all cell types (Supplemental  
276 Figures 9,10). Interestingly, this decrease occurred as *ChAT* and *VACHT* increased, potentially  
277 marking the transition from predominantly electrical synaptic coupling to chemical synaptic  
278 coupling. A summary of our scRNA-seq analyses aligned to our developmental interaction  
279 timecourse can be seen in Figure 3A,B.



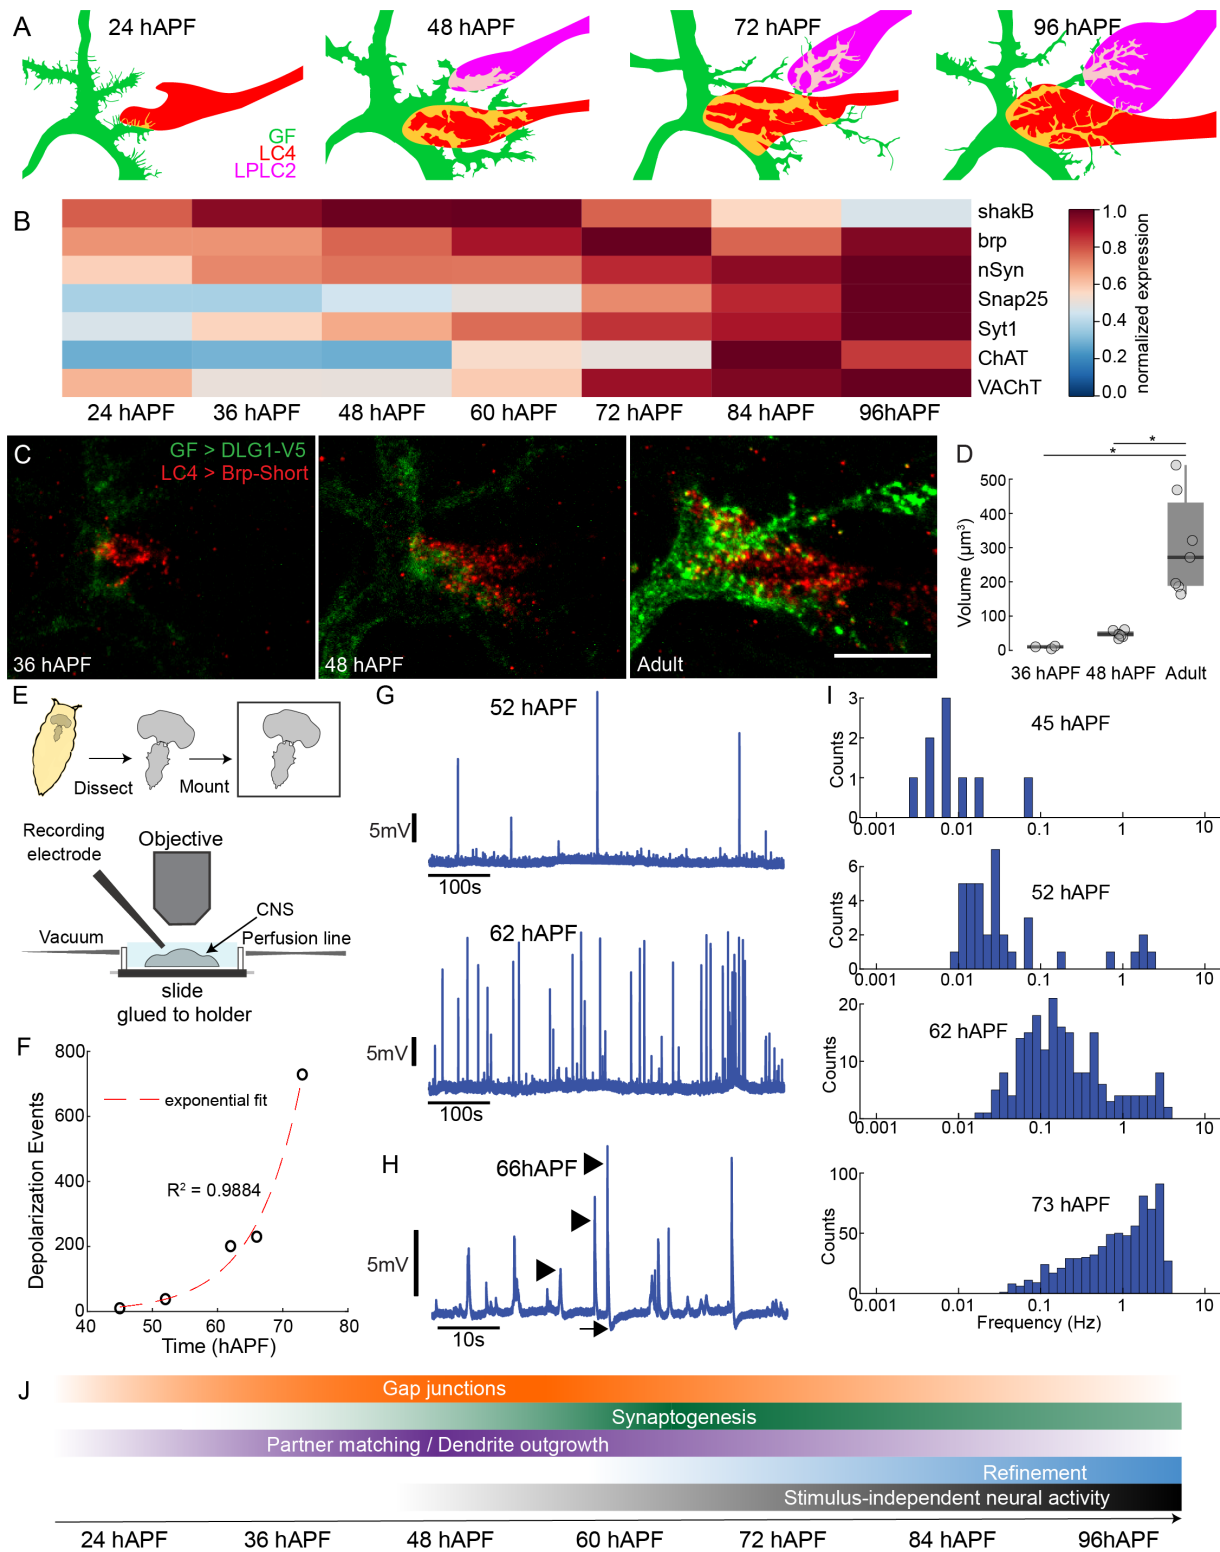

280

281 **Figure 3. Synaptogenesis and the emergence of stimulus-independent neural activity**

282 (A) Schematic of GF and VPN developmental interactions

283 **(B)** Heatmap timecourse of average, normalized VPN mRNA expression of genes for electrical  
284 and chemical synapse function. Data are from the optic lobe transcriptional atlas<sup>22</sup> and individual  
285 VPN expression patterns can be found in Supplemental Figure 9.  
286 **(C)** Max intensity projections of a substack of DLG expression in GF (DLG1-V5, green) and Brp  
287 puncta in LC4 (Brp-Short, red) at selected timepoints. Scale bar, 10 $\mu$ m.  
288 **(D)** Quantification of volume of Brp colocalized with DLG from (C). Unpaired Kruskal-Wallis  
289 test ( $p = 0.001$ ), Dunn-Sidak comparison test post hoc,  $* = p < .05$ ,  $N = 3-7$  hemibrains from 2-5  
290 flies.  
291 **(E)** Schematic of *ex-plant* pupal electrophysiology preparation.  
292 **(F)** The total number of identified depolarizing events increases exponentially (fit, dotted red  
293 line) over time.  $N = 5$  flies.  
294 **(G)** Representative traces of GF membrane potential recordings using the pupal  
295 electrophysiology preparation for two timepoints.  
296 **(H)** Zoomed in recording showing features resolvable with electrophysiology. Arrow indicates  
297 hyperpolarization following large depolarizing events, arrowheads indicate different event  
298 amplitudes.  
299 **(I)** Distribution of event frequencies from inter-event intervals.  
300 **(J)** Timecourse of developmental stages as estimated from anatomical, scRNA-seq and  
301 electrophysiology data.  
302

### 303 **GF and VPN synapse assembly is initiated during the partner matching stages**

304 While our scRNA-seq data provide an estimate of gene expression across development,  
305 relative levels of mRNA do not necessarily correlate linearly to protein translation<sup>45</sup>. Therefore,  
306 using our scRNA-seq data to guide our hypotheses, we next investigated the temporal expression  
307 patterns of select pre- and postsynaptic proteins in VPN and GF. We utilized an iteration of  
308 Synaptic Tagging with Recombination (STaR)<sup>46</sup> to visualize LPLC2 and LC4 specific Brp,  
309 driven by its endogenous promoter and tagged with smGdP-V5. From our scRNA-seq data, *brp*  
310 is expressed early in both LC4 and LPLC2 (Supplemental Figures 9,10). Using *LC4\_4-split-*  
311 *GAL4* and *LPLC2-split-GAL4* driver lines that turn on prior to 36 hAPF, we quantified the  
312 fluorescence of V5-tagged Brp over metamorphosis (Supplemental Figure 11). We found Brp  
313 already present in LC4 at 36 hAPF, as supported by the RNAseq data, and that Brp expression  
314 increased until 60 hAPF. Unexpectedly, we witnessed a delay in the appearance and peak  
315 expression of Brp in LPLC2, similar to the staggered arrival times of LC4 and LPLC2 onto GF



316 dendrites. It is possible that the assembly of synaptic machinery is delayed in LPLC2 to  
317 accommodate its arrival time. However, because V5-tagged Brp expression is dependent not  
318 only on the native *brp* promoter but also limited by when the VPN driver line turns on, the  
319 differences in Brp appearance could also be due to temporal differences in the driver lines.  
320 These data suggest presynaptic machinery is already present during initial partner matching  
321 between VPN and GF and increases as contacts are refined and stabilized.

322 We next investigated whether Brp accumulating at presynaptic terminals in VPNs was  
323 directly opposed to postsynaptic machinery, as an indicator of functional pre/postsynaptic sites.  
324 To label presynaptic Brp in VPN, we established a new transgenic line that expresses Brp-Short  
325 tagged with GFP under the control of the *lexAop* promoter (*lexAop-Brp-Short-GFP*). Brp-Short  
326 is a truncated, non-functional Brp protein that localizes to sites of endogenous full-length Brp  
327 without disrupting morphology or function<sup>47</sup> and has been used to map synaptic organization in  
328 the *Drosophila* CNS<sup>48,49</sup>. To label postsynaptic machinery in the GF, we targeted discs large 1  
329 (*dlg1*), the fly PSD-95 ortholog<sup>50</sup> using *dlg1[4K]*, a conditional tagging strategy that enables  
330 cell-type specific (*UAS-FLP*) V5-tagging of endogenous DLG1<sup>49</sup>. Combining these tools with  
331 our GF and VPN driver lines, we achieved co-expression of LC4-specific Brp-Short-GFP, and  
332 GF-specific DLG1-V5 and investigated protein expression patterns at distinct developmental  
333 stages. We observed faint, diffuse DLG1-V5 expression 36 hAPF (Figure 3C,D), around the time  
334 when initial GF and VPN contacts are observed (Figure 2F). However, significant DLG1-V5 and  
335 Brp-Short colocalization was not observed until 48 hAPF, although it remained only a small  
336 fraction of what was witnessed in the adult (Figure 3C,D). Our data suggest that although pre-  
337 and postsynaptic proteins are present at the initial stages of partner matching, it is not until  
338 around 48 hAPF that they begin to assemble functional synaptic connections.

339

## 340 **GF exhibits stimulus-independent neural activity during development**

341       Our Brp-Short / DLG1-V5 dual labeling experiments suggest functional pre- and  
342 postsynaptic sites are present around 48 hAPF. Interestingly, within fly optic lobe neurons,  
343 sporadic and infrequent neural activity is first witnessed, through Ca<sup>2+</sup> imaging, around 45  
344 hAPF<sup>51</sup>. Developmental activity within DN<sub>s</sub> has not been investigated, so we set out to  
345 determine when activity first initializes within the GF and characterize GF activity patterns over  
346 development. We developed an *ex-plant* pupal electrophysiology preparation for high resolution  
347 recordings of the GF membrane potential over time (Figure 3E). Briefly, the entire pupal CNS  
348 was dissected and mounted onto a coverslip, which was then attached to a customized holder that  
349 enabled us to perfuse oxygenated extracellular saline during recordings. Using our preparation,  
350 we recorded from the GF for approximately one hour in current-clamp mode at distinct  
351 developmental time periods. At 45 hAPF, we witnessed sporadic, infrequent depolarizing events  
352 (Figure 3F and Supplemental Figure 12), aligning with the emergence of activity in the optic  
353 lobes<sup>51</sup> and the initial opposition of Brp/DLG puncta (Figure 3C,D). The number of depolarizing  
354 events increased exponentially as development progressed (Figure 3F,G, Supplemental Figure  
355 12), mirroring the increased expression of cholinergic synaptic machinery within the scRNA-seq  
356 data (Figure 3B, Supplemental Figures 9,10). As expected with an increase in the number of  
357 depolarizing events, the interval between events decreased (inter-event frequency increased) as a  
358 function of age (Figure 3I, Supplemental Figure 12).

359       Our recordings enabled us to observe hyperpolarizing events (Figure 3H, arrow) that  
360 occasionally preceded large depolarizing events (Figure 3H, arrowheads), and small amplitude  
361 events that would not be resolvable with Ca<sup>2+</sup> imaging. We also observed a broad distribution in

362 event frequency (Figure 3G,I) instead of one dominant frequency from distinct alternating phases  
363 between silence and activity as seen in optic lobe or whole brain  $\text{Ca}^{2+}$  imaging from 55 - 65  
364 hAPF<sup>51,52</sup>. It is possible our *ex-plant* preparation may alter activity patterns from those observed  
365 *in-vivo*. Alternatively, our recordings report activity not resolvable in  $\text{Ca}^{2+}$  imaging, and central  
366 brain neurons like the GF may display broader patterns as they pool input across many diverse  
367 cell types. Altogether, our data (summarized in Figure 3J) suggest initial GF partner matching  
368 precedes synaptogenesis. GF synapses become functional around 48 hAPF, with an upregulation  
369 of gap junction proteins and the appearance of apposed pre and postsynaptic machinery  
370 suggesting electrical (predominant) and chemical (minor) synapses contribute to the underlying  
371 activity witnessed at this stage. In the later stages of development, the frequency of synaptic  
372 events increase as gap junction proteins are downregulated and cholinergic presynaptic  
373 machinery is upregulated to enhance and stabilize synapses with intended synaptic partners while  
374 refining unintended contacts.

375

### 376 **LC4 ablation results in an increase of GF contacts with the LPLC2 glomerulus**

377       After establishing our timecourse of GF and VPN interactions, we next investigated  
378 potential mechanisms that regulate VPN targeting and localization onto GF dendrites. Our data  
379 suggest synaptic activity does not contribute to the initial stages of VPN to GF partner matching.  
380 However, activity could be necessary for maintenance of the medial-lateral division of LC4 and  
381 LPLC2 inputs on GF dendrites, as neuronal activity can be crucial for proper refinement<sup>53-57</sup>. To  
382 test this, we attempted to silence LC4 during development by expressing the inwardly rectifying  
383 potassium channel Kir2.<sup>17,58</sup> using *LC4\_4-split-GAL4*. However, we found early expression of  
384 *Kir2.1* resulted in a significant loss of LC4 (Figure 4A; Supplemental Figure 13A-D). Expression

385 of *Kir2.1* with a driver line used in previous silencing experiments<sup>6</sup> that turns on later in  
386 development (*LC4\_1-split-GAL4*) did not cause a loss of LC4 (Supplemental Figure 13A-D). As  
387 our *LC4\_4-split-GAL4* driver line turns on ~18 hAPF, prior to initial LC4 to GF contact, these  
388 data suggest that overexpression of Kir2.1 early in development is detrimental to LC4 survival,  
389 potentially due to the inability to compensate for disruptions in ionic homeostasis or the direct  
390 induction of apoptosis<sup>59-61</sup>. Co-expression of an apoptosis inhibitor p35<sup>62</sup> with Kir2.1 using our  
391 *LC4\_4-split-GAL4* driver line, however did not prevent cell death (Supplemental Figure 13E,F),  
392 potentially due to redundancies in apoptosis pathways or the relative timing of expression.

393 With our finding we could use Kir2.1 as a tool to ablate LC4, we reframed our question  
394 to examine how the physical loss of LC4 alters LPLC2 morphology and targeting. Given that  
395 LC4 contacts GF dendrites ~24 hours prior to LPLC2, we wondered if LC4 physically restricts  
396 LPLC2 from extending to medial regions of the GF optic glomeruli dendrites. We expressed  
397 tdTomato in LPLC2 using a LexA driver line (*LPLC2-LexA*) while simultaneously driving  
398 myrGFP or Kir2.1 with *LC4\_4-split-GAL4*. In adult flies where Kir2.1 expression ablated the  
399 majority of LC4, the LPLC2 axon bundle extended into areas where the LC4 glomerulus would  
400 be expected and we witnessed a significant increase the LPLC2 glomerulus volume (Figure  
401 4B,C). Due to the witnessed expansion of the LPLC2 glomerulus, we next investigated whether  
402 the loss of LC4 increased the territory GF dendrites occupied within the LPLC2 glomerulus. We  
403 expressed Kir2.1 with *LC4\_4-split-GAL4* to achieve LC4 cell death, while simultaneously  
404 expressing tdTomato in GF using *GF\_1-LexA*. We identified the LPLC2 glomerulus using a  
405 neuropil label (*Brp*) and again found that LC4 cell loss resulted in an LPLC2 glomerulus with  
406 altered morphology as compared to control flies (Figure 4D,E). We then quantified the overlap  
407 between GF dendrites and the LPLC2 glomerulus (Figure 4F). We found that LC4 ablation more

408 than doubled the amount of colocalization between GF dendrites and the LPLC2 glomerulus,  
409 with the glomerulus expanding onto more medial regions of the GF dendrites as compared to  
410 controls (Figure 4D-F). In summary, our data demonstrate LC4 ablation results in altered LPLC2  
411 axonal morphology and increased GF dendritic arborizations within the LPLC2 glomerulus,  
412 suggesting the early arrival and physical presence of LC4 may impede LPLC2 from contacting  
413 more medial regions of the GF.

414 To revisit our original question as to whether activity influences GF and VPN  
415 connectivity, we expressed Kir2.1 in LC4 using our late, *LC4\_1-split-GAL4* driver line, and  
416 tdTomato in GF using our *GF\_1-LexA* driver. The *LC4\_1-split-GAL4* driver line should be  
417 effective at silencing LC4 as it expresses Kir2.1 prior to the onset of GF activity, as witnessed  
418 here (Figure 3F,G , Supplemental Figure 12), and Ca<sup>2+</sup> activity, as observed in the fly's visual  
419 system<sup>51</sup>. We found no significant difference in the density or localization of contacts between  
420 GF and LC4 whether we expressed Kir2.1 or myrGFP in LC4 (Figure 4G,H). These data suggest  
421 LC4 localization along GF dendrites is activity independent, and the early arrival and physical  
422 presence of LC4 axons restricts LPLC2 targeting to the lateral regions of GF dendrites.

423

#### 424 **Functional compensation in the GF circuit occurs after LC4 ablation**

425 Our anatomical data suggest the loss of LC4, but not silencing of its activity, during  
426 development results in a reconfiguration of contacts between LPLC2 and GF. We next  
427 investigated whether the apparent change in connectivity had functional consequences, affecting  
428 GF's encoding of ethologically relevant visual stimuli. GF are tuned to looming stimuli – the 2D  
429 projections of an object approaching on a direct collision course. LC4 provides to the GF  
430 information about the angular speed while LPLC2 provides information about the angular size of

431 a looming object<sup>6,7</sup>. We recorded GF responses in tethered, behaving flies using whole-cell patch  
432 clamp electrophysiology<sup>63</sup> (Figure 4I). We displayed looming stimuli across different radius to  
433 speed ( $r/v$ ) ratios where the contributions of LC4 and LPLC2 to the GF response have been  
434 previously established<sup>6,7</sup>. In control animals, LPLC2 contributions are maintained across stimuli,  
435 as the range in stimulus size does not change, while LC4 contributions increase as stimuli  
436 become more abrupt<sup>6</sup>.

437 We found, as reported previously<sup>6</sup>, that silencing LC4 by expressing Kir2.1 using the  
438 *LC4\_1-split-GAL4* driver line reduced the GF response to looming stimuli as stimuli became  
439 more abrupt (Figure 4I-K). To further verify Kir2.1 silencing was effective, we expressed Kir2.1  
440 in lamina monopolar cells 1 and 2 (L1-L2), the early-stage inputs to motion vision processing<sup>64,65</sup>  
441 which ameliorated GF responses, as reported previously<sup>6</sup> (Supplemental Figure 14). However,  
442 in contrast to what we witnessed with silencing, we found the ablation of the majority of the LC4  
443 population, by expressing Kir2.1 with our *LC4\_4-split-GAL4* driver line, resulted in an enhanced  
444 GF response to looming stimuli (Figure 4I-K), aligned with the observed increase in GF  
445 dendrites occupying the LPLC2 glomerulus (Figure 4D-F). Our data support that the  
446 developmental reorganization of LPLC2 and GF following LC4 ablation is functionally  
447 significant and leads to an over-compensation in the GF looming response.



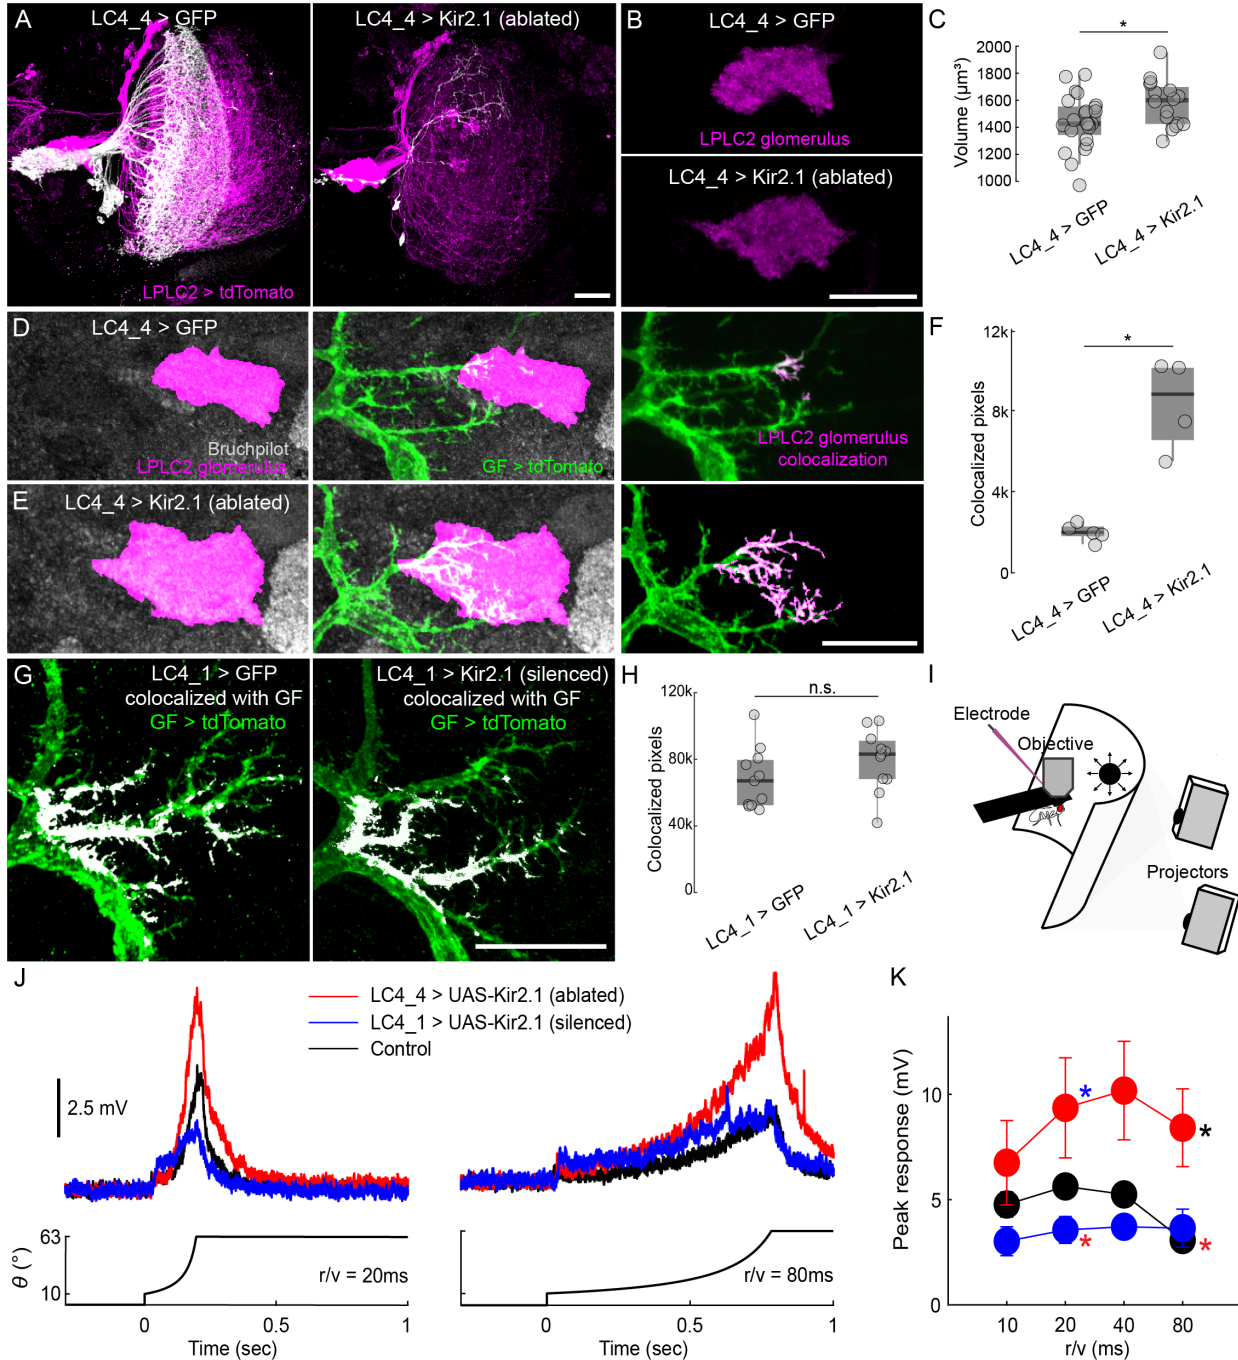

448

449

450

451

452

453

454

455

456

**Figure 4. Developmental ablation of LC4 with Kir2.1 alters the morphology of the LPLC2 glomerulus and increases LPLC2 contacts and functional drive onto GF.**

(A) Maximum intensity projections of LPLC2 expressing tdTomato (magenta) and LC4 (white) expressing GFP (left) or Kir2.1 (right) using LC4\_4, a driver line that turns on early in development. Scale bar, 20 $\mu\text{m}$ .

(B) Maximum intensity projections of a substack of the LPLC2 glomerulus (magenta) in a fly where LC4 express GFP (top) or are ablated through Kir2.1 expression (bottom). Scale bar, 20 $\mu\text{m}$ .

457 (C) Quantification of LPLC2 glomerulus volume in (B). Two-sample *t*-test,  $p = .0273$ ,  $N = 16-24$   
458 hemibrains from 8-13 flies.

459 (D) Maximum intensity projections of Brp (NC82, gray) with the LPLC2 glomerulus highlighted  
460 (magenta) in a fly where GFP was expressed early in LC4 (left). Maximum intensity projections  
461 of GF dendrites (tdTomato, green) extending into the LPLC2 glomerulus (middle). Maximum  
462 intensity projections of colocalized pixels (magenta) between GF and the LPLC2 glomerulus  
463 superimposed onto the GF (right).

464 (E) Maximum intensity projections of Brp (gray) with the LPLC2 glomerulus highlighted  
465 (magenta) in a fly where Kir2.1 was expressed early to ablate LC4 (left). Maximum intensity  
466 projections of GF dendrites (tdTomato, green) extending into the LPLC2 glomerulus (middle).  
467 Maximum intensity projections of colocalized pixels (magenta) between GF and the LPLC2  
468 glomerulus superimposed onto the GF (right). Scale bar,  $20\mu\text{m}$ .

469 (F) Quantification of colocalization between GF and the LPLC2 glomerulus from (D,E).  
470 Unpaired Mann-Whitney U test,  $p = .0159$ ,  $N \geq 4$  hemibrains from  $\geq 4$  flies.

471 (G) Maximum intensity projections of GF expressing smGFP (green) with colocalized pixels  
472 (white) between LC4 expressing GFP (left) or silenced by Kir2.1 (right) using an LC4-split-Gal4  
473 driver that turns on late during development (*LC4\_1-split-GAL4*). Scale bar,  $20\mu\text{m}$ .

474 (H) Quantification of colocalization in (G). Unpaired Mann-Whitney U test,  $p = .1486$ ,  $N \geq 11$   
475 hemibrains from  $\geq 6$  flies.

476 (I) Schematic representing *in-vivo* electrophysiology setup for head-fixed adult flies. Visual  
477 stimuli (looms) were presented ipsilateral to the side of the recording via projection onto a screen  
478 positioned in front of the fly.

479 (J) Average GF responses to select looming stimuli presentations of different radius to speed  
480 ratios ( $r/v$ ).

481 (K) Quantification of peak amplitude responses to looming stimuli presentations in (J). Unpaired  
482 Kruskal-Wallis test ( $r/v = 10\text{ms}$ ,  $p = .1105$ ;  $r/v = 20\text{ms}$ ,  $p = .0443$ ;  $r/v = 40\text{ms}$ ,  $p = .0556$ ;  $r/v =$   
483  $80\text{ms}$ ,  $p = .0385$ ), Tukey-Kramer multiple comparison test post hoc,  $* = p < .05$ ,  $N = 6-8$  flies.

484

485

## 486 DISCUSSION

487 Here, our investigation into the interactions of GF dendrites and VPN axons support a  
488 developmental program where GF and partner VPNs make initial contact in precise, stereotyped  
489 regions that are maintained into eclosion through competitive, physical interactions. Ablation of  
490 one major VPN partner (LC4) results in territory expansion of another VPN (LPLC2) that  
491 confers compensatory functional changes within the GF circuit. After initial VPN territories are  
492 established, GF dendrites continue to arborize and increase contacts with VPNs, while avoiding  
493 contacts with non-synaptic neighbors. This developmental stage coincides with an upregulation  
494 of gap junctions, the opposition of pre- and postsynaptic proteins, and the onset of developmental



495 activity in the GF. This outgrowth is followed by a period of stabilization/refinement that  
496 coincides with an upregulation of cholinergic synaptic machinery and an increase in the  
497 frequency of developmental activity in the GF. This developmental time course is summarized in  
498 Figure 3A,J. Our data establish the GF escape circuit as a sophisticated developmental model  
499 that can be used to study mechanisms establishing integration of sensory inputs within a  
500 sensorimotor circuit, the role neural activity plays in shaping circuit connectivity and refinement,  
501 and the relationship between expressed genes and circuit development and function.

502         The development of the *Drosophila* visual system proceeds in a series of steps which  
503 likely serve to reduce the complexity of wiring paradigms from neurons of the same or  
504 neighboring cell-types, highlighting the importance of timing<sup>66</sup>. We found staggered interactions  
505 of the GF with VPN partners, where LC4 contacts the GF approximately 24-36 hours prior to  
506 LPLC2. This staggered arrival of VPN axons could reduce the complexity of decisions made by  
507 the GF during partner matching, as is also seen in the olfactory glomeruli in an *ex-plant*  
508 preparation where axons of pioneer olfactory receptor neurons (ORNs) terminate in posterior  
509 regions, and ORNs arriving later terminate in anterior regions<sup>67</sup>. From 36-72 hAPF, we observe  
510 an increase in GF dendritic complexity and extension and increase in contacts with VPN  
511 partners, coordinated with an upregulation of genes involved in the SNARE complex (Figure  
512 3A,B). This period of precise targeting and outgrowth likely reflects a robust partner matching  
513 program, potentially through ligand-receptor or attractive/repulsive cues<sup>68</sup>. Our confocal data  
514 provide high-resolution snapshots of membranes at distinct periods over metamorphosis, but as  
515 metamorphosis is a dynamic process, future work could incorporate time-lapsed imaging to  
516 investigate transient interactions that may have been missed.

517 Our GF and VPN colocalization data show a developmental progression that begins with  
518 partner matching between VPN and GF in stereotyped regions, an increase of contacts with  
519 synaptic partners, proceeded by refinement as neurons assume their adult morphology.  
520 Comparison with the time course of scRNA-seq data provides insight into genes that may play a  
521 role in these processes. We find gap junction coupling may serve a role in partner matching, as  
522 *shakB* expression is high at this time (Supplemental Figure 9)<sup>22</sup>. Our data also support a  
523 transition from predominantly electrical to chemical synapses as witnessed in other species<sup>69,70</sup> at  
524 the onset of refinement. *shakB* is downregulated while cholinergic synaptic machinery *ChAT* and  
525 *VAcHT* (Figure 3B and Supplemental Figures 9,10) are upregulated. Our model system is well  
526 poised to investigate the role of electrical and chemical signaling, and their supporting genes, in  
527 circuit development and function.

528 We provide the first electrophysiological recordings of developmental neural activity in  
529 pupal neurons, a phenomenon that has been documented in developing vertebrate systems, and  
530 recently proposed within the fly with Ca<sup>2+</sup> imaging<sup>53-57,69,71-75</sup>. Our data demonstrate activity in  
531 the GF emerges as early as 45 hAPF, and increases in frequency as a function of time. While  
532 scRNA-seq data and our Brp-Short and DLG1-V5 protein expression data suggests this activity  
533 is driven through functional electrical and chemical synapses, changes in GF intrinsic properties  
534 may also contribute to witnessed changes in frequency. For example, recordings from the  
535 superior olivary nucleus in the avian auditory brainstem over embryonic development to  
536 hatching show neuronal excitability increases due to changes in K<sup>+</sup> and Na<sup>+</sup> ion channel  
537 conductance<sup>76</sup>, therefore further investigation into what drives these changes in GF activity is  
538 warranted.

539 To record spontaneous activity in pupal GF neurons we developed an *ex-plant* system  
540 that differs from established *ex-vivo* systems<sup>77-79</sup> in that we are not attempting to culture our ex-  
541 plant long term and replicate *in-vivo* conditions through the addition of ecdysone to aid neuronal  
542 development. To our knowledge, developmental activity within these ex-vivo systems has yet to  
543 be reported. We find in our ex-plant noticeable similarities to the recent discovery of *in-vivo*  
544 activity patterns in the developing fly nervous system<sup>51</sup>. We first observe GF stimulus  
545 independent activity (stimulus independent because all sensory organs are no longer connected)  
546 as infrequent events around 45 hAPF, similar to sparse Ca<sup>2+</sup> activity witnessed in the fly optic  
547 lobes at this same time<sup>51</sup>. As development progresses, the frequency of depolarizing events in  
548 the GF increases, similar to what has been reported *in-vivo*. However, we find no discernible  
549 phases of activity and silence as observed *in-vivo* via calcium imaging around 55-65 hAPF,  
550 classified as the periodic stage of patterned, stimulus independent neural activity (PSINA). We  
551 instead witness a progression into what resembles the later turbulent phase of PSINA that occurs  
552 around 70 hAPF to eclosion<sup>51</sup>. As *in-vivo* activity in individual developing DNs or central brain  
553 neurons has as of yet to be reported, our data could represent actual *in-vivo* activity patterns from  
554 neurons in the central brain where multiple inputs converge. Alternatively, even if our removal  
555 of the CNS disrupts activity patterns observed *in-vivo*, our ex-plant could provide a highly  
556 accessible model system to uncover the underlying mechanisms for how particular activity  
557 patterns arise.

558 The location of a synapse on a dendrite can impact its overall effect on a neuron, and  
559 establish how it contributes to neural computations<sup>80-82</sup>. We find the location of synapses of each  
560 VPN cell type to be highly stereotyped, suggesting location may impact computation, although  
561 this has yet to be directly investigated. Our contact data suggest that targeting of LC4 and

562 LPLC2 to their respective regions is established upon initial contact instead of refinement in the  
563 later stages of development. This is noticeably different from ORN axonal targeting to olfactory  
564 glomeruli, where axons target many neighboring glomeruli and are eventually refined to a  
565 specific glomerulus<sup>67,83,84</sup>. It is possible specific protein interactions establish LC4 and LPLC2  
566 target specificity<sup>68,85-87</sup>, similar to how basket interneurons target the axon initial segment of  
567 Purkinje cells in the vertebrate cerebellum via localized cell adhesion molecules and adaptor  
568 proteins<sup>88-91</sup>. Our data, however, support that axon arrival times also play a role, with LC4 first  
569 contacting GF dendrites in medial regions, physically impeding LPLC2, and leaving LPLC2  
570 segregated to the lateral regions. This physical barrier may explain why LPLC2 is able to extend  
571 into medial regions following LC4 ablation (Figure 4D-F). We do however find LPLC2 does not  
572 fully replace LC4 along the dendrites, suggesting segregation may arise from a combination of  
573 physical restraints from LC4 and potentially other neurons, in addition to molecular interactions.  
574 It does not appear that activity-based mechanisms influence the localization of LC4 and LPLC2  
575 to specific regions because silencing activity in LC4 does not result in significant changes in  
576 LC4/GF contact density or localization (Figure 4G,H). In addition, elimination of the majority of  
577 LC4 neurons did not affect targeting of the remaining LC4 neurons to the GF dendrites in the  
578 expected regions.

579         We also report altered GF output to looming stimulus presentations (Figure 4J,K)  
580 following LC4 ablation as an example of developmental plasticity to preserve an evolutionary  
581 conserved escape behavior that is critical to the fly's survival. Because we observe a significant  
582 increase in GF dendritic occupancy within the LPLC2 glomerulus, our prevailing hypothesis is  
583 that LPLC2 synaptic inputs to GF have increased. Alternatively, the 1-7 LC4 neurons that remain  
584 after ablation may also have increased synaptic input, however the consistency of the

585 compensatory responses as looming stimulus parameters change ( $r/v$ ) and the limited visual field  
586 coverage with just 1-7 LC4 neurons supports compensation through remaining LC4 is unlikely to  
587 underlie the enhanced GF responses.

588         While we here demonstrate stereotyped targeting of VPNs to distinct regions on GF  
589 dendrites, emerging work suggests an additional level of targeting may occur within individual  
590 VPNs. It was previously suggested, based on light microscopy data, that retinotopy is lost within  
591 the seemingly random terminations of VPN axons in most optic glomeruli, unlike in vertebrate  
592 systems where established retinotopy in the retina is maintained in projections to the lateral  
593 geniculate nucleus and superior colliculus/tectum<sup>92-94</sup>. However, recent evidence suggests VPNs  
594 preserve spatial information by biasing synaptic input to postsynaptic neurons relative to their  
595 receptive field<sup>8,10,19</sup>. This is seen in LC4 synaptic inputs to postsynaptic DNp02 and DNp11  
596 neurons, where LC4 synaptic inputs to DNp02 increase along the posterior to anterior visual  
597 axis, and LC4 synaptic inputs to DNp11 increase along the anterior to posterior visual axis<sup>10</sup>.  
598 LC4 inputs to GF do not appear to bias synapse numbers based on their receptive field, but a bias  
599 of synaptic inputs from LPLC2 to GF exists along the ventral to dorsal axis<sup>10</sup>. As synaptic  
600 gradients appear to be utilized amongst many VPN neurons, our model system is well poised to  
601 investigate when and how these synaptic biases arise.

602         In summary, our data provides a detailed anatomical, transcriptomic, and functional  
603 description of GF and VPN development. Our model is unique in that we can observe multiple  
604 visual feature inputs competing for dendritic space, providing a complex sensorimotor model to  
605 the field that will be useful to determine the relationship between connectivity and sensorimotor  
606 integration. The GF also receives input from other brain regions outside of the optic glomeruli<sup>95</sup>,  
607 and it would be interesting to characterize the development of GF with respect to these other

608 regions and further investigate how these inputs influence GF output. Finally, these VPN are  
609 only a few of the 20+ VPN that terminate in the optic glomeruli, and GF is one of hundreds of  
610 DNs, expanding the opportunity to uncover conserved, fundamental mechanisms for the wiring  
611 of sensorimotor circuits.

612

## 613 **METHODS**

### 614 **Fly genotypes and rearing**

615 *Drosophila* stocks (Table 1) and experimental crosses (Supplementary Table 1) were  
616 reared on a traditional molasses, cornmeal, and yeast diet (Archon Scientific), maintained at  
617 25°C and 60% humidity on a 12-hour light/dark cycle, except for optogenetics experiments  
618 where dark reared flies were raised on 0.2 mM retinal food as larva and switched to 0.4 mM  
619 retinal food following eclosion. All experiments were performed on pupal or adult female flies 2-  
620 5 days post-eclosion. New split-GAL4 drivers lines SS02569 and SS02570 were generated using  
621 previously described methods<sup>11</sup>. The Janelia FlyLight Project Team contributed to split-GAL4  
622 screening and stock construction.

623

624 Table 1. *Drosophila* Stocks

| <b>DROSPHILA STOCKS</b>                                                                                                                                  | <b>SOURCE</b>                   | <b>IDENTIFIER</b> |
|----------------------------------------------------------------------------------------------------------------------------------------------------------|---------------------------------|-------------------|
| <i>UAS-myr::smGFP-HA, lexAop-myr::smGFP-V5 (smGFP): pJFRC200-10XUAS-IVS-myr::smGFP-HA (attP18), pJFRC216-13XlexAop2-IVS-myr::smGFP-V5 su(Hw)attP8;;.</i> | Nern et al., 2015 <sup>96</sup> |                   |

|                                                                                                                                                                                    |                                                                           |  |
|------------------------------------------------------------------------------------------------------------------------------------------------------------------------------------|---------------------------------------------------------------------------|--|
| <b><i>UAS-Kir 2.1_1:</i></b><br><i>w+; pJFC49-10xUAS-IVS-eGFP Kir2.1 (Su(Hw)attP6);</i>                                                                                            | Michael Reiser, Ed Rogers, Janelia Research Campus                        |  |
| <b><i>UAS-Kir 2.1_2:</i></b><br><i>w+;; pJFRC49-10xUAS-IVS-eGFP-Kir2.1 (attP2)</i>                                                                                                 | Pfeiffer et al., 2012 <sup>58</sup> ; von Reyn et al., 2014 <sup>17</sup> |  |
| <b><i>smGdP-STaR:</i></b> ; <i>LexAop-myr::tdTomato, UAS-R; brp-RSR-SmGdP-V5-2A-LexA</i>                                                                                           | Peng et al., 2018 <sup>46</sup>                                           |  |
| <b><i>UAS-myr:GFP:</i></b> <i>pJFRC12-10XUAS-IVS-myr::GFP (su(Hw)attP1);;</i>                                                                                                      | Pfeiffer et al., 2012 <sup>58</sup>                                       |  |
| <b><i>UAS-tdTomato:</i></b><br><i>pJFRC22-10xUAS-IVS-myr::tdtomato (su(Hw)attP8);;</i>                                                                                             | Pfeiffer et al., 2012 <sup>58</sup>                                       |  |
| <b><i>GF_2-LexA, lexAop-GFP; UAS-Kir:</i></b> <i>w+; 68A06-LexAp65 (VK00022), pJFRC57-13XLexAop2-IVS-GFP-p10 (su(Hw)attP5)/(CyO); pJFRC49-10XUAS-IVS-eGFPKir2.1 (attP2)/(TM6b)</i> | Ache et al., 2019 <sup>7</sup>                                            |  |
| <b><i>UAS-p35:</i></b> <i>3<sup>rd</sup> chromosome</i>                                                                                                                            | Pecot et al., 2014 <sup>62</sup>                                          |  |
| <b><i>GRASP:</i></b> ; <i>lexAop-GFP_11; UAS-GFP_1-10</i>                                                                                                                          | Gordon & Scott, 2009 <sup>25</sup>                                        |  |
| <b><i>UAS-CsChrimson:</i></b> <i>UAS-CsChrimson-mVenus (attp18);;</i>                                                                                                              | Klapoetke et al., 2014 <sup>97</sup>                                      |  |
| <b><i>GF_1-LexA (early GF):</i></b><br><i>;; VT042336_LexA (attP2)</i>                                                                                                             | Tirian & Dickson, 2017 <sup>24</sup>                                      |  |
| <b><i>GF_2-LexA (late GF):</i></b><br><i>;68A06 LexA (VK00022);</i>                                                                                                                | Pfeiffer et al., 2010 <sup>98</sup>                                       |  |
| <b><i>GF_1-GAL4:</i></b><br><i>;; VT042336_GAL4 (attP2)</i>                                                                                                                        | Tirian & Dickson, 2017 <sup>24</sup>                                      |  |

|                                                                                              |                                     |  |
|----------------------------------------------------------------------------------------------|-------------------------------------|--|
| <b>LC4_4-split-GAL4 (early LC4):</b> ;R49C04_P65ADZp (attP2); R86D05_ZpGbd (attP40)          | This study                          |  |
| <b>LC4_1-split-GAL4 (SS00315) (late LC4):</b> ;R47H03_P65ADZp (attP40); R72E01_ZpGbd (attP2) | Wu et al., 2016 <sup>11</sup>       |  |
| <b>LPLC1_1-split-GAL4 (OL0029B):</b> ;R64G09_P65ADZp (attP40);R37H05_ZpGbd (attP2)           | Wu et al., 2016 <sup>11</sup>       |  |
| <b>LPLC1_2-split-GAL4 (SS02569):</b> R64G09_P65ADZp (attP40); VT045990_ZpGbd (attP2)         | This study                          |  |
| <b>LPLC1_3-split-GAL4 (SS02570):</b> R64G09_P65ADZp (attP40); VT063739_ZpGbd (attP2)         | This study                          |  |
| <b>LPLC2-split-GAL4 (OL0048B):</b> ;R19G02_P65ADZp (attP40);R75G12_ZpGbd (attP2)             | Wu et al., 2016 <sup>99</sup>       |  |
| <b>LPLC2_LexA:</b> ;75G12-LexAp65 (attP40);                                                  | Pfeiffer et al., 2010 <sup>98</sup> |  |
| <b>LC4-LexA:</b> ;93G05-LexA (attP40);                                                       | Pfeiffer et al., 2010 <sup>98</sup> |  |
| <b>LC11-split-GAL4 (OL0015B):</b> ;22H02_p65ADZp (attP40); R20G06_ZpGbd (attP2)              | Wu et al., 2016                     |  |
| <b>L1/L2-split-GAL4 (SS00797):</b> w+; R48A08-p65ADZp in attP40; R29G11-ZpGbd in attP2)      | Tuthill et al., 2013 <sup>65</sup>  |  |
| <b>dlg1[4K]</b>                                                                              | Parisi et al., 2023 <sup>49</sup>   |  |
| <b>UAS-TNT:</b> UAS-TeTxLC.tnt                                                               | Sweeney et al., 1995 <sup>100</sup> |  |
| <b>lexAop-Brp-Short-GFP</b>                                                                  | This study                          |  |



626 **Developmental staging**

627 Pupal staging across developmental time points has been previously described<sup>99</sup>. In brief,  
628 the sex of white pre-pupa was identified, and females were transferred to a separate petri dish,  
629 marked as 0 hours after pupa formation (hAPF), and reared for the appropriate amount of time at  
630 25°C before dissection. Dissections were performed within a 2-hour window of a targeted pupal  
631 developmental stage. All pupal dissections were synchronized and processed through  
632 immunohistochemistry protocols for pixel intensity measurements of images.

633

634 **Immunohistochemistry**

635 All dissections were performed in cold Schneider's insect media (S2, Sigma Aldrich,  
636 #S01416) within a 15-minute window before solution exchange to avoid tissue degradation.  
637 Brains were then transferred to a 1% paraformaldehyde (20% PFA, Electron Microscopy  
638 Sciences, #15713) in S2 solution and fixed overnight at 4°C while rotating.  
639 Immunohistochemistry was performed as described previously<sup>96</sup>. Primary and secondary  
640 antibodies are listed in Table 2. Supplementary Table 1 lists antibodies used for each figure with  
641 their respective dilutions. Following immunostaining, brains mounted onto poly-L-lysine (Sigma  
642 Aldrich, #25988-63-0) coated coverslips were dehydrated in increasing alcohol concentrations  
643 (30, 50, 75, 95, 100, 100) for 5 minutes in each, followed by two 5-minute Xylene clearing steps  
644 (Fisher Scientific, #X5-500). Coverslips were mounted onto a prepared slide (75 x 25 x 1 mm)  
645 (Corning, #2948-75X25) with coverslip spacers (25 x 25 mm) (Corning, #2845-25) placed on  
646 each end of the slide to prevent brain compression. Brain mounted slides were left to dry for at  
647 least 48 hours prior to imaging.

648

649 Table 2. Resources and Reagents

| <b>RESOURCES OR REAGENTS</b>             | <b>SOURCE</b>                     | <b>IDENTIFIER</b>                     |
|------------------------------------------|-----------------------------------|---------------------------------------|
| <b>Mouse anti-nc82</b>                   | DSHB                              | CAT# - AB2314866<br>RRID: AB_2314866  |
| <b>Rabbit anti-GFP</b>                   | Life<br>technologies              | CAT# - A11122<br>RRID: AB_221569      |
| <b>Chicken anti-GFP</b>                  | EMD<br>Millipore                  | CAT# - AB16901<br>RRID: AB_11212200   |
| <b>Rabbit anti-HA</b>                    | Cell<br>Signaling<br>Technologies | CAT# - C29F4<br>RRID: AB_1549585      |
| <b>Alexa Fluor 488 goat anti-chicken</b> | Invitrogen                        | CAT# - A11039<br>RRID: AB_2534096     |
| <b>Alexa Fluor 488 goat anti-rabbit</b>  | Invitrogen                        | CAT# - A11034<br>RRID: AB_2576217     |
| <b>Alexa Fluor 568 goat anti-rabbit</b>  | Invitrogen                        | CAT# - A11011<br>RRID: AB_143157      |
| <b>Alexa Fluor 568 goat anti-rat</b>     | Life<br>technologies              | CAT# - A11077<br>RRID: AB_2534121     |
| <b>Alexa Fluor 647 goat anti-Mouse</b>   | Life<br>technologies              | CAT# - A21236<br>RRID: AB_2525805     |
| <b>DyLight 550 anti-HA</b>               | Invitrogen                        | CAT# - 26183-D550<br>RRID: AB_2533052 |

|                                                                                           |            |                                               |
|-------------------------------------------------------------------------------------------|------------|-----------------------------------------------|
| <b>DyLight 488 anti-HA</b>                                                                | Invitrogen | CAT# - 26183-D488<br>RRID: AB_2533051         |
| <b>DyLight 550 anti-V5</b>                                                                | Bio-rad    | CAT# -<br>Mca1360D550GA<br>RRID: AB_2687576   |
| <b>DyLight 650 anti-V5</b>                                                                | Invitrogen | CAT# - MA5-15253-<br>D650<br>RRID: AB_2527642 |
| <b>Living Colors DsRed Polyclonal Antibody</b>                                            | TakaraBio  | CAT# - 632496<br>RRID: AB_10013483            |
| <b>Mouse anti-Broad</b>                                                                   | DSHB       | CAT# - AB_528104<br>RRID: AB_528104           |
| <b>KDo2 lexAop2rev_PspXI: 5'</b><br><b>TGACcctcgagCGTTCAGCTGCGCTTGTTTATT</b><br><b>3'</b> | This study |                                               |
| <b>KDo1 lexAop2for: 5'</b><br><b>TCCGCGTTTCCAGACTTTAC 3'</b>                              | This study |                                               |

650

## 651 **Confocal Microscopy**

652 Unless otherwise stated, all images were taken on an Olympus Fluoview 1000 confocal  
653 system. Images were taken with a 60x, 1.42 NA oil immersion objective to achieve a voxel size  
654 of .103 $\mu$ m x .103 $\mu$ m x .45 $\mu$ m. Imaging parameters were minimally adjusted between images to  
655 achieve an image that utilizes the full pixel intensity range without oversaturating pixels. This

656 was necessary as driver lines in earlier pupal developmental periods showed lower levels of  
657 expression than in later pupal developmental stages, therefore imaging parameters were adjusted  
658 to optimize the membrane signal-to-noise ratio for each developmental stage that would allow  
659 for optimized mask generation used in image analysis. In analyses where pixel intensities were  
660 compared across developmental stages, all imaging parameters were kept consistent across all  
661 images. STaR images were taken on a Zeiss LSM 700 with a 63x, 1.4 NA oil immersion  
662 objective to achieve a voxel size of  $.06\mu\text{m} \times .06\mu\text{m} \times .44\mu\text{m}$ . Imaging parameters were kept  
663 consistent to allow for comparison across all samples. Images for LPLC2 glomerulus volume  
664 quantification were taken on a Zeiss LSM 700 with a 63x, 1.4 NA oil immersion objective with a  
665 magnification of 0.50 to achieve a voxel size of  $.0992\mu\text{m} \times .0992\mu\text{m} \times .3946\mu\text{m}$ .

666

## 667 **Electron Microscopy**

668 The publicly available electron microscopy hemibrain dataset (version 1.2.1)<sup>21</sup> was used  
669 in this paper. NeuPrint<sup>23</sup> was used to create renderings and connectivity diagrams.

670

## 671 **Image analyses**

672 A region of interest (ROI) was drawn around the GF optic glomeruli dendrites to quantify  
673 dendritic complexity and length. To quantify dendritic complexity, all pixels in this ROI were  
674 summed. The Euclidean distance was measured from the beginning (most medial aspect) of the  
675 GF optic glomeruli dendrites to the tip to calculate dendritic length.

676 To quantify membrane colocalization between GF and VPN neurons across development,  
677 intensity-based thresholding was first used to generate a binary mask of each neuron membrane.  
678 Using a custom GUI written in MATLAB, threshold values were manually selected to include

679 processes of each cell-type while excluding background and regions of the neuron that were out  
680 of focus in each z-plane. Generated binary masks were inspected to make sure each mask was  
681 representative of the imaged neuron membrane channel. In certain cases, the set threshold did not  
682 include very fine neurites that were difficult to discriminate from background. Lowering  
683 threshold values to capture these processes in the mask would result in background being  
684 included into the mask as well, therefore generated masks may exclude some of the finer  
685 dendritic processes with low SNR. Using these masks, colocalized pixels were collected plane-  
686 by-plane across the entire image stack using Boolean operators between GF and VPN masks.  
687 This output matrix resulted in a z-stack where only GF and VPN membranes were colocalized.  
688 In some images, GF membrane labeling had a low SNR and prevented accurate mask generation  
689 and was therefore excluded from analyses. In some cases, non-GF and non-VPN cell-types were  
690 labeled with the driver lines, therefore these data were excluded from analyses. To increase rigor,  
691 a second method to quantify GF to VPN membrane colocalization was used. Confocal stacks of  
692 labeled neuronal membranes were 3D rendered in Imaris using the Surfaces function. Thresholds  
693 were manually applied to generate 3D masks of neuronal membranes so that the rendered 3D  
694 image was representative of the imaged membrane. Similar to MATLAB thresholding, in certain  
695 cases the set threshold did not include fine neurites as they were difficult to discriminate from the  
696 background using automated algorithms. Following initial 3D membrane renderings, renderings  
697 were inspected and regions where faint processes were still visible but not detected in the  
698 thresholding pipeline were manually filled in using the ‘Magic Wand’ function. Once 3D  
699 rendering was complete, areas of colocalization were identified using the ‘Surface-Surface  
700 contact area’ XTension, and the volume of this output was quantified.

701 To determine the density of VPN contacts along the GF optic glomeruli dendrite, a z-  
702 projection of the GF was manually aligned and rotated using anatomical landmarks consistently  
703 observed to align the lateral dendrite along the medial-lateral axis (x-axis). The same rotation  
704 and alignment were applied to the appropriate membrane colocalization matrix. An ROI was  
705 then drawn around the GF optic glomeruli dendrites, with anatomical landmarks consistently  
706 observed used to denote the beginning and end of the optic glomeruli dendrite. To account for  
707 variation in the optic glomeruli dendrite extension across images, we normalized the x-axis to the  
708 length of the drawn ROI (i.e., GF lateral dendrite). To determine where VPN contacts were  
709 localized along the dorsal-ventral axis (y-axis), the same images were used, but normalized the  
710 y-axis to the length of the drawn ROI. Total colocalized pixels were summed along each column  
711 or row, respectively, and the pixel density for each column or row was averaged across brains in  
712 each condition, then plotted along the normalized axis.

713 To quantify the average pixel intensity of VPN-specific Bruchpilot (Brp) puncta across  
714 developmental timepoints, VPN masks were generated from the membrane channel using the  
715 same pipeline used for the GF and VPN membrane colocalization. These binary masks were then  
716 multiplied to the Brp-puncta channel to gather raw pixel intensities for Brp-V5 puncta localized  
717 to the VPN membrane. The total intensity sum of the glomerulus was divided by the total  
718 number of membrane localized pixels to calculate the average pixel intensity.

719 To isolate Brp pixels that colocalized with DLG, the DLG channel was first thresholded  
720 using FIJI's default auto-thresholding function, binarized in MATLAB, and then multiplied to  
721 the Brp channel. An ROI mask was then used to restrict Brp analysis to the VPN glomerulus of  
722 interest. The total number of Brp positive pixels was then calculated and the overall volume of  
723 Brp-DLG colocalization computed by multiplying the total pixel count by the image voxel size.

724 To quantify LPLC2 glomerulus volume, the LPLC2-membrane channel and Brp channel  
725 were thresholded in Fiji and binarized using MATLAB as described above. The two channels  
726 were then multiplied where pixels containing both membrane label and Brp were considered part  
727 of the glomerulus. Glomerulus volume was determined by multiplying the total glomerulus pixel  
728 count by image voxel size.

729 For analyses where dendrite complexity and extension were quantified (Figure 2B,C), a  
730 median filter was used to remove background noise. For all other images, no pre-processing was  
731 performed, and only the brightness and contrast were adjusted to highlight neuronal processes  
732 when preparing images for figure generation. For all data sets using the GF-LexA driver line,  
733 any images that had non-GF cell types within our ROI and low or no GF expression because of  
734 driver line stochasticity were excluded from analyses.

735

### 736 **Creation of the LexAop2-Brp-Short-GFP-HSV Transgenic Line**

737 To create a transgenic line expressing Brp-Short-GFP under control of the lexAop  
738 promoter (lexAop-Brp-Short-GFP), we used the Gateway cloning system (Thermo Fisher  
739 Scientific, cat. No. K202020) via an existing plasmid containing the UAS-Brp-Short sequence<sup>101</sup>  
740 followed by a Gateway cassette. We excised the UAS sequence using dual HindIII and PspXI  
741 restriction digests and replaced the promoter with a lexAoperon sequence, flanked by HindIII and  
742 PspXI restriction sites, that was first PCR amplified using custom primers (see Table 2) from a  
743 plasmid containing lexAop2 (lexAop2-myr-4xSNAPf, RRID: Addgene 87638) and then  
744 restriction digested using HindIII and PspXI (New England BioLabs, Ipswich, MA) to create  
745 compatible sticky ends. Following ligation and confirmation of the appropriate promoter insertion  
746 by sequencing, we replaced the Gateway cassette with the GFP-HSV tag from an Entry vector via

747 Gateway LR recombination reaction (Thermo Fisher Scientific, cat. no. 11791019). Plasmid  
748 identity and the presence of all components was verified by sequencing (GeneWiz, South  
749 Plainfield, NJ). Transgenic lines of the resultant plasmid inserted into the  $\phi$ C31 site at attP2  
750 (Bloomington Drosophila Stock Center, RRID: 8622) located at 68A4 on the 3<sup>rd</sup> chromosome were  
751 then produced using standard methods (BestGene, Inc., Chino Hills, CA). Subsequent lines were  
752 verified by genomic sequencing and a single line chosen for experiments.

753

#### 754 **Kir2.1 cell death and GF dendrite localization**

755 To quantify LC4 cell death following early expression of Kir2.1, immunohistochemistry  
756 was performed against a GFP conjugated to Kir2.1 or GFP (controls), and Brp. Following  
757 imaging, LC4 cell bodies were manually counted using the GFP channel. To quantify GF  
758 dendrite density within the LPLC2 glomerulus following LC4 cell death, the Brp channel was  
759 used to visualize the optic glomeruli active zones. Axons that make up each individual  
760 glomerulus reliably terminate in the same region of the central brain, allowing for consistent  
761 identification of the LPLC2 glomerulus.

762

#### 763 **scRNA-seq data analysis**

764 To quantify changes in mRNA expression over development for our cells of interest, a  
765 recently published scRNA-seq dataset was used<sup>22</sup>. For each developmental stage for each  
766 population, an unpaired non-parametric Kruskal-Wallis test by ranks was performed, followed  
767 by a Dunn-Bonferroni multiple comparisons test for significant groups.

768

#### 769 **Electrophysiology**



770 For adult whole-cell electrophysiology, female flies were head fixed to recording plates  
771 via UV glue, antenna were UV-glued, and the front legs were removed at the level of the femur  
772 as described previously<sup>6,63</sup>. GFP positive GF soma were accessed for recordings by removing the  
773 cuticle and overlying trachea, and then removing the perineural sheath by local application of  
774 collagenase (0.5% in extracellular saline). Brains were perfused with standard extracellular  
775 saline (103 mM NaCl, 3 mM KCl, 5 mM *N*-Tris (hydroxymethyl)methyl-2- aminoethane-  
776 sulfonic acid, 8 mM trehalose, 10 mM glucose, 26 mM NaHCO<sub>3</sub>, 1 mM NaH<sub>2</sub>PO<sub>4</sub>, 1.5 mM  
777 CaCl<sub>2</sub> and 4 mM MgCl<sub>2</sub>, pH 7.3, 270–275), bubbled with 95% O<sub>2</sub>/5% CO<sub>2</sub> and held at  
778 22°C. Recording electrodes (3.5–6.2 MΩ) were filled with intracellular saline (140 mM  
779 potassium aspartate, 10 mM HEPES, 1 mM EGTA, 4 mM MgATP, 0.5 mM Na<sub>3</sub>GTP, 1 mM  
780 KCl, 20 μM Alexa-568-hydrazide-Na, 260–275 mOsm, pH 7.3). Recordings were acquired in  
781 whole-cell, current clamp mode, digitized at 20kHz, and low pass filtered at 10kHz. All data  
782 were collected using Wavesurfer, an open-source software ([https://www.janelia.org/open-](https://www.janelia.org/open-science/wavesurfer)  
783 [science/wavesurfer](https://www.janelia.org/open-science/wavesurfer)) running in MATLAB. Recordings were deemed acceptable if a high seal  
784 was attained prior to break through, the resting membrane potential was  $\leq -55$  mV, and the input  
785 resistance was  $> 50$  MΩ. Current was not injected to hold the membrane potential at a particular  
786 resting level, and traces were not corrected for a 13mV liquid junction potential<sup>102</sup>.

787 All pupal recordings were staged in accordance with our staging protocol. Extracellular  
788 and intracellular reagents used were identical to the reagents used for adult recordings.  
789 Recordings were acquired in whole-cell, current clamp mode, digitized at 20kHz, and low pass  
790 filtered at 10kHz. All data were collected using Wavesurfer running in MATLAB. Recordings  
791 were deemed acceptable if recording electrodes (3.4 – 5.2 MΩ) attained a high seal (GΩ range)  
792 prior to break through, the resting membrane potential was below -30mV and remained stable

793 throughout the duration of the recording, and the input resistance ranged from 50 M $\Omega$  to 300  
794 M $\Omega$ . Current was not injected to hold the membrane potential at a particular resting level, and  
795 traces were not corrected for a 13mV liquid junction potential<sup>102</sup>.

796

## 797 **Optogenetics**

798 Light activation of VPN cell types expressing CsChrimson<sup>97</sup> while recording from GF  
799 was performed by delivering light (635nm LED, Scientifica) through a 40x objective focused on  
800 a head fixed fly. Light pulses (5ms, 1.7  $\mu$ W/mm<sup>2</sup>, as measured in air at the working distance of  
801 the objective) were delivered 5 times at 30 second intervals.

802

## 803 **Visual Stimuli**

804 Visual stimuli were projected on a cylindrical screen surrounding a head fixed fly during  
805 whole-cell electrophysiology following the protocol described previously<sup>63,103</sup>. A 4.5-inch  
806 diameter mylar cylindrical screen covered 180° in azimuth, and two DLP projectors (Texas  
807 Instruments Lightcrafter 4500) were used to minimize luminance attenuation at the end of the  
808 screen edge. The projections from the two projectors were calibrated on the cylindrical screen  
809 surface as described previously<sup>103</sup> and the two projections overlapped 18° in azimuth at center of  
810 the screen and blended for uniform illumination. Generated looming stimuli based on the  
811 equation<sup>104</sup> below and constant velocity expansion stimuli were displayed with 912 x 1140  
812 resolution in 6bit grayscale at 240 Hz which is above the flicker fusion frequency of *Drosophila*  
813 (100 Hz<sup>105</sup>). Looming stimuli were generated by simulating a 2D projection of an object  
814 approaching at a constant velocity which mimics an approaching predator. The angular size ( $\theta$ )

815 of the stimulus subtended by the approaching object and was calculated over time ( $t$ ) by the  
816 following equation<sup>104</sup>:

$$817 \quad \theta(t) = 2 \tan^{-1} \left( \frac{r}{vt} \right)$$

818 where  $t < 0$  before collision and  $t = 0$  at collision for an approaching object with a half size ( $r$ ) and  
819 constant velocity ( $v$ ). Four looming stimuli ( $r/v = 10, 20, 40, 80$ ms) were displayed, starting at  
820  $10^\circ$ , expanding to  $63^\circ$  and then held for 1 second. Stimuli were presented once per trial, in a  
821 randomized order, every 30 seconds. For each fly, two trials of the entire set of stimuli were  
822 averaged.

823

## 824 **Data analysis and Statistics**

825 No power analysis was performed prior to statistical analysis. Volume analysis in Figure  
826 3 was performed by a researcher blinded to the genotypes. All data from confocal microscopy  
827 experiments were tested for normality using a Kolmogorov-Smirnov test or Anderson-Darling  
828 test and the appropriate parametric or non-parametric test was performed, as stated in the figure  
829 captions.

830 For boxplots, the dividing line in the box indicates the median, the boxes contain the  
831 interquartile range, and the whiskers indicate the extent of data points within an additional  
832  $1.5 \times$  interquartile range.

833 For *in-vivo* electrophysiology analyses in adult recordings, all analyses were performed  
834 using custom MATLAB scripts. Recordings for each stimulus presentation were baseline  
835 subtracted by taking the average response one second prior to the stimulus onset. The magnitude  
836 of the GF expansion peak was measured after filtering each recording (Savitzky–Golay, fourth  
837 order polynomial, frame size is 1/10th the length of the stimulus). The normality of the data was

838 assessed using a Kolmogorov-Smirnov test. If the data were found to not follow a normal  
839 distribution, the appropriate non-parametric test was selected. For non-parametric analyses, a  
840 Kruskal-Wallis test was performed, and Tukey-Kramer post hoc test was performed for  
841 significant groups.

842         For *ex-plant* pupal recordings, all analyses were performed using in-house MATLAB  
843 scripts. Potential 60Hz noise was filtered out using a band-stop filter, and thirty minutes of data  
844 was quantified. The baseline was determined after two rounds of computing the average signal  
845 envelope. Peaks were identified by capturing all depolarizations that were 3mV above baseline  
846 and separated by at least 100ms. Time intervals between events were transformed into  
847 instantaneous frequency for histogram plots.

848

849

850

851

852

853

854

855

856

857

858

859

860

861

862

## 863 REFERENCES

- 864 1 Di Martino, A. *et al.* Unraveling the miswired connectome: a developmental perspective.  
865 *Neuron* **83**, 1335-1353, doi:10.1016/j.neuron.2014.08.050 (2014).
- 866 2 Zuo, X. N. Editorial: Mapping the Miswired Connectome in Autism Spectrum Disorder.  
867 *J Am Acad Child Adolesc Psychiatry* **59**, 348-349, doi:10.1016/j.jaac.2020.01.001 (2020).
- 868 3 Xie, Y. *et al.* Alterations in Connectome Dynamics in Autism Spectrum Disorder: A  
869 Harmonized Mega- and Meta-analysis Study Using the Autism Brain Imaging Data  
870 Exchange Dataset. *Biol Psychiatry* **91**, 945-955, doi:10.1016/j.biopsych.2021.12.004  
871 (2022).
- 872 4 Johnston, M. V. *et al.* Plasticity and injury in the developing brain. *Brain Dev* **31**, 1-10,  
873 doi:10.1016/j.braindev.2008.03.014 (2009).
- 874 5 Newport, E. L. *et al.* Language and developmental plasticity after perinatal stroke. *Proc*  
875 *Natl Acad Sci U S A* **119**, e2207293119, doi:10.1073/pnas.2207293119 (2022).
- 876 6 von Reyn, C. R. *et al.* Feature Integration Drives Probabilistic Behavior in the Drosophila  
877 Escape Response. *Neuron* **94**, 1190-1204 e1196, doi:10.1016/j.neuron.2017.05.036  
878 (2017).
- 879 7 Ache, J. M. *et al.* Neural Basis for Looming Size and Velocity Encoding in the  
880 Drosophila Giant Fiber Escape Pathway. *Curr Biol* **29**, 1073-1081 e1074,  
881 doi:10.1016/j.cub.2019.01.079 (2019).
- 882 8 Morimoto, M. M. *et al.* Spatial readout of visual looming in the central brain of  
883 Drosophila. *Elife* **9**, doi:10.7554/eLife.57685 (2020).
- 884 9 Klapoetke, N. C. *et al.* A functionally ordered visual feature map in the Drosophila brain.  
885 *Neuron* **110**, 1700-1711 e1706, doi:10.1016/j.neuron.2022.02.013 (2022).
- 886 10 Dombrowski, M. *et al.* Synaptic gradients transform object location to action. *Nature* **613**,  
887 534-542, doi:10.1038/s41586-022-05562-8 (2023).
- 888 11 Wu, M. *et al.* Visual projection neurons in the Drosophila lobula link feature detection to  
889 distinct behavioral programs. *Elife* **5**, doi:10.7554/eLife.21022 (2016).
- 890 12 Keles, M. & Frye, M. A. The eyes have it. *Elife* **6**, doi:10.7554/eLife.24896 (2017).
- 891 13 Klapoetke, N. C. *et al.* Ultra-selective looming detection from radial motion opponency.  
892 *Nature* **551**, 237-241, doi:10.1038/nature24626 (2017).
- 893 14 Ribeiro, I. M. A. *et al.* Visual Projection Neurons Mediating Directed Courtship in  
894 Drosophila. *Cell* **174**, 607-621 e618, doi:10.1016/j.cell.2018.06.020 (2018).
- 895 15 Hsu, C. T. & Bhandawat, V. Organization of descending neurons in Drosophila  
896 melanogaster. *Sci Rep* **6**, 20259, doi:10.1038/srep20259 (2016).
- 897 16 Namiki, S., Dickinson, M. H., Wong, A. M., Korff, W. & Card, G. M. The functional  
898 organization of descending sensory-motor pathways in Drosophila. *Elife* **7**,  
899 doi:10.7554/eLife.34272 (2018).
- 900 17 von Reyn, C. R. *et al.* A spike-timing mechanism for action selection. *Nat Neurosci* **17**,  
901 962-970, doi:10.1038/nn.3741 (2014).
- 902 18 Wilson, R. I. Early olfactory processing in Drosophila: mechanisms and principles. *Annu*  
903 *Rev Neurosci* **36**, 217-241, doi:10.1146/annurev-neuro-062111-150533 (2013).

- 904 19 Peek, M. Y. *Control of Escape Behavior by Descending Neurons in Drosophila*  
905 *Melanogaster*, The University of Chicago, (2018).
- 906 20 Zheng, Z. *et al.* A Complete Electron Microscopy Volume of the Brain of Adult  
907 *Drosophila melanogaster*. *Cell* **174**, 730-743 e722, doi:10.1016/j.cell.2018.06.019 (2018).
- 908 21 Scheffer, L. K. *et al.* A connectome and analysis of the adult *Drosophila* central brain.  
909 *Elife* **9**, doi:10.7554/eLife.57443 (2020).
- 910 22 Kurmangaliyev, Y. Z., Yoo, J., Valdes-Aleman, J., Sanfilippo, P. & Zipursky, S. L.  
911 Transcriptional Programs of Circuit Assembly in the *Drosophila* Visual System. *Neuron*  
912 **108**, 1045-1057 e1046, doi:10.1016/j.neuron.2020.10.006 (2020).
- 913 23 Clements, J. C. neuPrint: Analysis Tools for EM Connectomics. *BioRxiv* (2020).
- 914 24 Tirian, L. & Dickson, B. J. The VT GAL4, LexA, and split-GAL4 driver line collections  
915 for targeted expression in the *Drosophila* nervous system. *bioRxiv*, 198648,  
916 doi:10.1101/198648 (2017).
- 917 25 Gordon, M. D. & Scott, K. Motor control in a *Drosophila* taste circuit. *Neuron* **61**, 373-  
918 384, doi:10.1016/j.neuron.2008.12.033 (2009).
- 919 26 Feinberg, E. H. *et al.* GFP Reconstitution Across Synaptic Partners (GRASP) defines cell  
920 contacts and synapses in living nervous systems. *Neuron* **57**, 353-363,  
921 doi:10.1016/j.neuron.2007.11.030 (2008).
- 922 27 Allen, M. J., Drummond, J. A. & Moffat, K. G. Development of the giant fiber neuron of  
923 *Drosophila melanogaster*. *J Comp Neurol* **397**, 519-531, doi:10.1002/(sici)1096-  
924 9861(19980810)397:4<519::aid-cne5>3.0.co;2-4 (1998).
- 925 28 Jacobs, K., Todman, M. G., Allen, M. J., Davies, J. A. & Bacon, J. P. Synaptogenesis in  
926 the giant-fibre system of *Drosophila*: interaction of the giant fibre and its major  
927 motoneuronal target. *Development* **127**, 5203-5212, doi:10.1242/dev.127.23.5203  
928 (2000).
- 929 29 Godenschwege, T. A., Hu, H., Shan-Crofts, X., Goodman, C. S. & Murphey, R. K. Bi-  
930 directional signaling by Semaphorin 1a during central synapse formation in *Drosophila*.  
931 *Nat Neurosci* **5**, 1294-1301, doi:10.1038/nn976 (2002).
- 932 30 Murphey, R. K. *et al.* Targeted expression of shibire ts and semaphorin 1a reveals critical  
933 periods for synapse formation in the giant fiber of *Drosophila*. *Development* **130**, 3671-  
934 3682, doi:10.1242/dev.00598 (2003).
- 935 31 Allen, M. J., Godenschwege, T. A., Tanouye, M. A. & Phelan, P. Making an escape:  
936 development and function of the *Drosophila* giant fibre system. *Semin Cell Dev Biol* **17**,  
937 31-41, doi:10.1016/j.semcdb.2005.11.011 (2006).
- 938 32 Kennedy, T. & Brodie, K. Newly Identified Electrically Coupled Neurons Support  
939 Development of the *Drosophila* Giant Fiber Model Circuit. *eNeuro* **5**,  
940 doi:10.1523/ENEURO.0346-18.2018 (2018).
- 941 33 Phelan, P. *et al.* Molecular mechanism of rectification at identified electrical synapses in  
942 the *Drosophila* giant fiber system. *Curr Biol* **18**, 1955-1960,  
943 doi:10.1016/j.cub.2008.10.067 (2008).
- 944 34 Courgeon, M. & Desplan, C. Coordination of neural patterning in the *Drosophila* visual  
945 system. *Curr Opin Neurobiol* **56**, 153-159, doi:10.1016/j.conb.2019.01.024 (2019).
- 946 35 Mora, N. *et al.* A Temporal Transcriptional Switch Governs Stem Cell Division,  
947 Neuronal Numbers, and Maintenance of Differentiation. *Dev Cell* **45**, 53-66 e55,  
948 doi:10.1016/j.devcel.2018.02.023 (2018).



- 949 36 Apitz, H. & Salecker, I. A region-specific neurogenesis mode requires migratory  
950 progenitors in the Drosophila visual system. *Nat Neurosci* **18**, 46-55,  
951 doi:10.1038/nn.3896 (2015).
- 952 37 Pinto-Teixeira, F. *et al.* Development of Concurrent Retinotopic Maps in the Fly Motion  
953 Detection Circuit. *Cell* **173**, 485-498 e411, doi:10.1016/j.cell.2018.02.053 (2018).
- 954 38 Shearin, H. K., Quinn, C. D., Mackin, R. D., Macdonald, I. S. & Stowers, R. S. t-  
955 GRASP, a targeted GRASP for assessing neuronal connectivity. *J Neurosci Methods* **306**,  
956 94-102, doi:10.1016/j.jneumeth.2018.05.014 (2018).
- 957 39 Wagh, D. A. *et al.* Bruchpilot, a protein with homology to ELKS/CAST, is required for  
958 structural integrity and function of synaptic active zones in Drosophila. *Neuron* **49**, 833-  
959 844, doi:10.1016/j.neuron.2006.02.008 (2006).
- 960 40 Knapek, S., Sigrist, S. & Tanimoto, H. Bruchpilot, a synaptic active zone protein for  
961 anesthesia-resistant memory. *J Neurosci* **31**, 3453-3458, doi:10.1523/JNEUROSCI.2585-  
962 10.2011 (2011).
- 963 41 Megighian, A. *et al.* Evidence for a radial SNARE super-complex mediating  
964 neurotransmitter release at the Drosophila neuromuscular junction. *J Cell Sci* **126**, 3134-  
965 3140, doi:10.1242/jcs.123802 (2013).
- 966 42 Cho, R. W., Song, Y. & Littleton, J. T. Comparative analysis of Drosophila and  
967 mammalian complexins as fusion clamps and facilitators of neurotransmitter release. *Mol*  
968 *Cell Neurosci* **45**, 389-397, doi:10.1016/j.mcn.2010.07.012 (2010).
- 969 43 Scholz, N. *et al.* Complexin cooperates with Bruchpilot to tether synaptic vesicles to the  
970 active zone cytomatrix. *J Cell Biol* **218**, 1011-1026, doi:10.1083/jcb.201806155 (2019).
- 971 44 Davis, F. P. *et al.* A genetic, genomic, and computational resource for exploring neural  
972 circuit function. *Elife* **9**, doi:10.7554/eLife.50901 (2020).
- 973 45 Buccitelli, C. & Selbach, M. mRNAs, proteins and the emerging principles of gene  
974 expression control. *Nat Rev Genet* **21**, 630-644, doi:10.1038/s41576-020-0258-4 (2020).
- 975 46 Peng, J. *et al.* Drosophila Fezf coordinates laminar-specific connectivity through cell-  
976 intrinsic and cell-extrinsic mechanisms. *Elife* **7**, doi:10.7554/eLife.33962 (2018).
- 977 47 Fouquet, W. *et al.* Maturation of active zone assembly by Drosophila Bruchpilot. *J Cell*  
978 *Biol* **186**, 129-145, doi:10.1083/jcb.200812150 (2009).
- 979 48 Duhart, J. C. & Mosca, T. J. Genetic regulation of central synapse formation and  
980 organization in Drosophila melanogaster. *Genetics* **221**, doi:10.1093/genetics/iyac078  
981 (2022).
- 982 49 Parisi, M. J., Aimino, M. A. & Mosca, T. J. A conditional strategy for cell-type-specific  
983 labeling of endogenous excitatory synapses in Drosophila. *Cell Reports Methods* **3**,  
984 100477, doi:https://doi.org/10.1016/j.crmeth.2023.100477 (2023).
- 985 50 Woods, D. F. & Bryant, P. J. The discs-large tumor suppressor gene of Drosophila  
986 encodes a guanylate kinase homolog localized at septate junctions. *Cell* **66**, 451-464,  
987 doi:10.1016/0092-8674(81)90009-x (1991).
- 988 51 Akin, O., Bajar, B. T., Keles, M. F., Frye, M. A. & Zipursky, S. L. Cell-type-Specific  
989 Patterned Stimulus-Independent Neuronal Activity in the Drosophila Visual System  
990 during Synapse Formation. *Neuron* **101**, 894-904 e895,  
991 doi:10.1016/j.neuron.2019.01.008 (2019).
- 992 52 Bajar, B. T. *et al.* A discrete neuronal population coordinates brain-wide developmental  
993 activity. *Nature* **602**, 639-646, doi:10.1038/s41586-022-04406-9 (2022).



- 994 53 Wong, R. O., Meister, M. & Shatz, C. J. Transient period of correlated bursting activity  
995 during development of the mammalian retina. *Neuron* **11**, 923-938, doi:10.1016/0896-  
996 6273(93)90122-8 (1993).
- 997 54 Moreno-Juan, V. *et al.* Prenatal thalamic waves regulate cortical area size prior to sensory  
998 processing. *Nat Commun* **8**, 14172, doi:10.1038/ncomms14172 (2017).
- 999 55 D'Souza, S. & Lang, R. A. Retinal ganglion cell interactions shape the developing  
1000 mammalian visual system. *Development* **147**, doi:10.1242/dev.196535 (2020).
- 1001 56 Ackman, J. B., Burbridge, T. J. & Crair, M. C. Retinal waves coordinate patterned  
1002 activity throughout the developing visual system. *Nature* **490**, 219-225,  
1003 doi:10.1038/nature11529 (2012).
- 1004 57 Spitzer, N. C. Electrical activity in early neuronal development. *Nature* **444**, 707-712,  
1005 doi:10.1038/nature05300 (2006).
- 1006 58 Pfeiffer, B. D., Truman, J. W. & Rubin, G. M. Using translational enhancers to increase  
1007 transgene expression in *Drosophila*. *Proc Natl Acad Sci U S A* **109**, 6626-6631,  
1008 doi:10.1073/pnas.1204520109 (2012).
- 1009 59 Harrell, E. R., Pimentel, D. & Miesenbock, G. Changes in Presynaptic Gene Expression  
1010 during Homeostatic Compensation at a Central Synapse. *J Neurosci* **41**, 3054-3067,  
1011 doi:10.1523/JNEUROSCI.2979-20.2021 (2021).
- 1012 60 Yamazaki, D. *et al.* Contribution of K(ir)2 potassium channels to ATP-induced cell death  
1013 in brain capillary endothelial cells and reconstructed HEK293 cell model. *Am J Physiol*  
1014 *Cell Physiol* **300**, C75-86, doi:10.1152/ajpcell.00135.2010 (2011).
- 1015 61 Desai, N. S., Rutherford, L. C. & Turrigiano, G. G. Plasticity in the intrinsic excitability  
1016 of cortical pyramidal neurons. *Nat Neurosci* **2**, 515-520, doi:10.1038/9165 (1999).
- 1017 62 Pecot, M. Y. *et al.* Sequential axon-derived signals couple target survival and layer  
1018 specificity in the *Drosophila* visual system. *Neuron* **82**, 320-333,  
1019 doi:10.1016/j.neuron.2014.02.045 (2014).
- 1020 63 Jang, H., Goodman, D. P., Ausborn, J. & von Reyn, C. R. Azimuthal invariance to  
1021 looming stimuli in the *Drosophila* giant fiber escape circuit. *J Exp Biol* **226**,  
1022 doi:10.1242/jeb.244790 (2023).
- 1023 64 Joesch, M., Schnell, B., Raghu, S. V., Reiff, D. F. & Borst, A. ON and OFF pathways in  
1024 *Drosophila* motion vision. *Nature* **468**, 300-304, doi:10.1038/nature09545 (2010).
- 1025 65 Tuthill, J. C., Nern, A., Holtz, S. L., Rubin, G. M. & Reiser, M. B. Contributions of the  
1026 12 neuron classes in the fly lamina to motion vision. *Neuron* **79**, 128-140,  
1027 doi:10.1016/j.neuron.2013.05.024 (2013).
- 1028 66 Kolodkin, A. L. & Hiesinger, P. R. Wiring visual systems: common and divergent  
1029 mechanisms and principles. *Curr Opin Neurobiol* **42**, 128-135,  
1030 doi:10.1016/j.conb.2016.12.006 (2017).
- 1031 67 Li, T. *et al.* Cellular bases of olfactory circuit assembly revealed by systematic time-lapse  
1032 imaging. *Cell* **184**, 5107-5121 e5114, doi:10.1016/j.cell.2021.08.030 (2021).
- 1033 68 Sanes, J. R. & Zipursky, S. L. Synaptic Specificity, Recognition Molecules, and  
1034 Assembly of Neural Circuits. *Cell* **181**, 1434-1435, doi:10.1016/j.cell.2020.05.046  
1035 (2020).
- 1036 69 Luhmann, H. J. & Khazipov, R. Neuronal activity patterns in the developing barrel  
1037 cortex. *Neuroscience* **368**, 256-267, doi:10.1016/j.neuroscience.2017.05.025 (2018).

- 1038 70 Choi, B. J., Chen, Y. D. & Desplan, C. Building a circuit through correlated spontaneous  
1039 neuronal activity in the developing vertebrate and invertebrate visual systems. *Genes Dev*  
1040 **35**, 677-691, doi:10.1101/gad.348241.121 (2021).
- 1041 71 Kutsarova, E., Munz, M. & Ruthazer, E. S. Rules for Shaping Neural Connections in the  
1042 Developing Brain. *Front Neural Circuits* **10**, 111, doi:10.3389/fncir.2016.00111 (2016).
- 1043 72 Dupont, E., Hanganu, I. L., Kilb, W., Hirsch, S. & Luhmann, H. J. Rapid developmental  
1044 switch in the mechanisms driving early cortical columnar networks. *Nature* **439**, 79-83,  
1045 doi:10.1038/nature04264 (2006).
- 1046 73 Hanganu, I. L., Ben-Ari, Y. & Khazipov, R. Retinal waves trigger spindle bursts in the  
1047 neonatal rat visual cortex. *J Neurosci* **26**, 6728-6736, doi:10.1523/JNEUROSCI.0752-  
1048 06.2006 (2006).
- 1049 74 Yu, Y. C. *et al.* Preferential electrical coupling regulates neocortical lineage-dependent  
1050 microcircuit assembly. *Nature* **486**, 113-117, doi:10.1038/nature10958 (2012).
- 1051 75 Shatz, C. J. Emergence of order in visual system development. *Proc Natl Acad Sci U S A*  
1052 **93**, 602-608, doi:10.1073/pnas.93.2.602 (1996).
- 1053 76 Carroll, B. J., Bertram, R. & Hyson, R. L. Intrinsic physiology of inhibitory neurons  
1054 changes over auditory development. *J Neurophysiol* **119**, 290-304,  
1055 doi:10.1152/jn.00447.2017 (2018).
- 1056 77 Rabinovich, D., Maysel, O. & Schuldiner, O. Long term ex vivo culturing of  
1057 *Drosophila* brain as a method to live image pupal brains: insights into the cellular  
1058 mechanisms of neuronal remodeling. *Front Cell Neurosci* **9**, 327,  
1059 doi:10.3389/fncel.2015.00327 (2015).
- 1060 78 Ozel, M. N., Langen, M., Hassan, B. A. & Hiesinger, P. R. Filopodial dynamics and  
1061 growth cone stabilization in *Drosophila* visual circuit development. *Elife* **4**,  
1062 doi:10.7554/eLife.10721 (2015).
- 1063 79 Li, T. & Luo, L. An Explant System for Time-Lapse Imaging Studies of Olfactory Circuit  
1064 Assembly in *Drosophila*. *J Vis Exp*, doi:10.3791/62983 (2021).
- 1065 80 Spruston, N. Pyramidal neurons: dendritic structure and synaptic integration. *Nat Rev*  
1066 *Neurosci* **9**, 206-221, doi:10.1038/nrn2286 (2008).
- 1067 81 Gidon, A. & Segev, I. Principles governing the operation of synaptic inhibition in  
1068 dendrites. *Neuron* **75**, 330-341, doi:10.1016/j.neuron.2012.05.015 (2012).
- 1069 82 Ferreira, J. S. *et al.* Distance-dependent regulation of NMDAR nanoscale organization  
1070 along hippocampal neuron dendrites. *Proc Natl Acad Sci U S A* **117**, 24526-24533,  
1071 doi:10.1073/pnas.1922477117 (2020).
- 1072 83 Jefferis, G. S. *et al.* Developmental origin of wiring specificity in the olfactory system of  
1073 *Drosophila*. *Development* **131**, 117-130, doi:10.1242/dev.00896 (2004).
- 1074 84 Berdnik, D., Chihara, T., Couto, A. & Luo, L. Wiring stability of the adult *Drosophila*  
1075 olfactory circuit after lesion. *J Neurosci* **26**, 3367-3376, doi:10.1523/JNEUROSCI.4941-  
1076 05.2006 (2006).
- 1077 85 Yogeve, S. & Shen, K. Cellular and molecular mechanisms of synaptic specificity. *Annu*  
1078 *Rev Cell Dev Biol* **30**, 417-437, doi:10.1146/annurev-cellbio-100913-012953 (2014).
- 1079 86 Sassoe-Pognetto, M. & Patrizi, A. The Purkinje cell as a model of synaptogenesis and  
1080 synaptic specificity. *Brain Res Bull* **129**, 12-17, doi:10.1016/j.brainresbull.2016.10.004  
1081 (2017).

- 1082 87 Chowdhury, D., Watters, K. & Biederer, T. Synaptic recognition molecules in  
1083 development and disease. *Curr Top Dev Biol* **142**, 319-370,  
1084 doi:10.1016/bs.ctdb.2020.12.009 (2021).
- 1085 88 Zhou, D. *et al.* AnkyrinG is required for clustering of voltage-gated Na channels at axon  
1086 initial segments and for normal action potential firing. *J Cell Biol* **143**, 1295-1304,  
1087 doi:10.1083/jcb.143.5.1295 (1998).
- 1088 89 Brachet, A. *et al.* Ankyrin G restricts ion channel diffusion at the axonal initial segment  
1089 before the establishment of the diffusion barrier. *J Cell Biol* **191**, 383-395,  
1090 doi:10.1083/jcb.201003042 (2010).
- 1091 90 Ango, F. *et al.* Ankyrin-based subcellular gradient of neurofascin, an immunoglobulin  
1092 family protein, directs GABAergic innervation at purkinje axon initial segment. *Cell* **119**,  
1093 257-272, doi:10.1016/j.cell.2004.10.004 (2004).
- 1094 91 Buttermore, E. D. *et al.* Pinceau organization in the cerebellum requires distinct functions  
1095 of neurofascin in Purkinje and basket neurons during postnatal development. *J Neurosci*  
1096 **32**, 4724-4742, doi:10.1523/JNEUROSCI.5602-11.2012 (2012).
- 1097 92 Sanes, J. R. & Zipursky, S. L. Design principles of insect and vertebrate visual systems.  
1098 *Neuron* **66**, 15-36, doi:10.1016/j.neuron.2010.01.018 (2010).
- 1099 93 Seabrook, T. A., Burbridge, T. J., Crair, M. C. & Huberman, A. D. Architecture,  
1100 Function, and Assembly of the Mouse Visual System. *Annu Rev Neurosci* **40**, 499-538,  
1101 doi:10.1146/annurev-neuro-071714-033842 (2017).
- 1102 94 Schneider, K. A. & Kastner, S. Visual responses of the human superior colliculus: a high-  
1103 resolution functional magnetic resonance imaging study. *J Neurophysiol* **94**, 2491-2503,  
1104 doi:10.1152/jn.00288.2005 (2005).
- 1105 95 Pezier, A. P., Jezzini, S. H., Bacon, J. P. & Blagburn, J. M. Shaking B Mediates Synaptic  
1106 Coupling between Auditory Sensory Neurons and the Giant Fiber of *Drosophila*  
1107 *melanogaster*. *PLoS One* **11**, e0152211, doi:10.1371/journal.pone.0152211 (2016).
- 1108 96 Nern, A., Pfeiffer, B. D. & Rubin, G. M. Optimized tools for multicolor stochastic  
1109 labeling reveal diverse stereotyped cell arrangements in the fly visual system. *Proc Natl*  
1110 *Acad Sci U S A* **112**, E2967-2976, doi:10.1073/pnas.1506763112 (2015).
- 1111 97 Klapoetke, N. C. *et al.* Independent optical excitation of distinct neural populations. *Nat*  
1112 *Methods* **11**, 338-346, doi:10.1038/nmeth.2836 (2014).
- 1113 98 Pfeiffer, B. D. *et al.* Refinement of tools for targeted gene expression in *Drosophila*.  
1114 *Genetics* **186**, 735-755, doi:10.1534/genetics.110.119917 (2010).
- 1115 99 Wu, J. S. & Luo, L. A protocol for dissecting *Drosophila melanogaster* brains for live  
1116 imaging or immunostaining. *Nat Protoc* **1**, 2110-2115, doi:10.1038/nprot.2006.336  
1117 (2006).
- 1118 100 Sweeney, S. T., Broadie, K., Keane, J., Niemann, H. & O'Kane, C. J. Targeted expression  
1119 of tetanus toxin light chain in *Drosophila* specifically eliminates synaptic transmission  
1120 and causes behavioral defects. *Neuron* **14**, 341-351, doi:10.1016/0896-6273(95)90290-2  
1121 (1995).
- 1122 101 Mosca, T. J., Luginbuhl, D. J., Wang, I. E. & Luo, L. Presynaptic LRP4 promotes  
1123 synapse number and function of excitatory CNS neurons. *Elife* **6**,  
1124 doi:10.7554/eLife.27347 (2017).
- 1125 102 Gouwens, N. W. & Wilson, R. I. Signal propagation in *Drosophila* central neurons. *J*  
1126 *Neurosci* **29**, 6239-6249, doi:10.1523/JNEUROSCI.0764-09.2009 (2009).

- 1127 103 Goodman, D. P., Eldredge, A. & von Reyn, C. R. A novel assay to evaluate action  
1128 selection in escape behavior. *J Neurosci Methods* **304**, 154-161,  
1129 doi:10.1016/j.jneumeth.2018.04.019 (2018).  
1130 104 Gabbiani, F., Krapp, H. G. & Laurent, G. Computation of object approach by a wide-  
1131 field, motion-sensitive neuron. *J Neurosci* **19**, 1122-1141, doi:10.1523/JNEUROSCI.19-  
1132 03-01122.1999 (1999).  
1133 105 Niven, J. E. *et al.* The contribution of Shaker K<sup>+</sup> channels to the information capacity of  
1134 *Drosophila* photoreceptors. *Nature* **421**, 630-634, doi:10.1038/nature01384 (2003).  
1135

## 1136 **ACKNOWLEDGEMENTS**

1137 We thank the *Janelia FlyLight* project team for assistance with split-GAL4 generation. This  
1138 study was supported in part by the National Science Foundation (grant no. IOS-1921065 to  
1139 C.R.v.R.), the National Institutes of Health (NINDS R01NS118562 to C.R.v.R.) and the  
1140 Margaret Q. Landenberger Research Foundation (grant to C.R.v.R.).

1141

## 1142 **AUTHOR CONTRIBUTIONS**

1143 Conceptualization C.R.v.R.; Methodology, B.W.M and C.R.v.R.; Investigation, B.W.M., H.J.,  
1144 Y.Z.K., N.S., B.W.H. and C.R.v.R. Writing – Original Draft, B.W.M. and C.R.v.R.; Writing –  
1145 Review & Editing, B.W.M., N.S., H.J., B.W.H., T.A.G., Y.Z.K., A.N., M.J.P, K.C.D, T.J.M.,  
1146 and C.R.v.R.; Funding Acquisition, C.R.v.R.; Resources, M.J.P, K.C.D, T.J.M., T.A.G., Y.Z.K.  
1147 and A.N.; Supervision, C.R.v.R.

1148

## 1149 **DECLARATION OF INTERESTS**

1150 The authors declare no competing interests.

1151
